# Supplementary material for: One-pot sequential alcohol oxidation and asymmetric α-oxyamination in aqueous media using recyclable resin-supported peptide catalyst
Source: Royal Society of Chemistry journal article supplement (doi:10.1039/c0cc02301a), 2010-01-01

**One-pot sequential alcohol oxidations and asymmetric  $\alpha$ -oxyamination in aqueous media using recyclable resin-supported peptide catalyst**

*Kengo Akagawa, Takuma Fujiwara, Seiji Sakamoto, Kazuaki Kudo\**

**General information.**

$^1\text{H}$  and  $^{13}\text{C}$  NMR spectra were recorded at 400 and 100 MHz respectively on a JEOL JNM-LA400 spectrometer, and chemical shifts were referenced to internal tetramethylsilane (TMS,  $\delta = 0.0$  ppm) for  $^1\text{H}$ , the central line of  $\text{CDCl}_3$  ( $\delta = 77.0$  ppm) for  $^{13}\text{C}$ . PEG-PS supported peptide catalyst **1** was synthesized according to the same method as previously described.<sup>8,9c</sup> HPLC analyses were carried out on a Shimadzu CLASS-VP system using Chiralcel OD-H column (25 cm) and OD-H guard (1 cm), Chiralpak IA column (25 cm) and IA guard (1 cm), or Chiralcel OJ (25 cm). FAB mass measurements were performed on JEOL JMS-600H.

**Examinations of reaction conditions for  $\alpha$ -oxyamination of aldehyde:** To estimate the reaction efficiency in  $\alpha$ -oxyamination of an aldehyde with copper(I) chloride, the ratio of starting aldehyde **2**, carboxylic acid **5**, and desired product **6** was analyzed by  $^1\text{H}$  NMR measurement of crude mixtures.

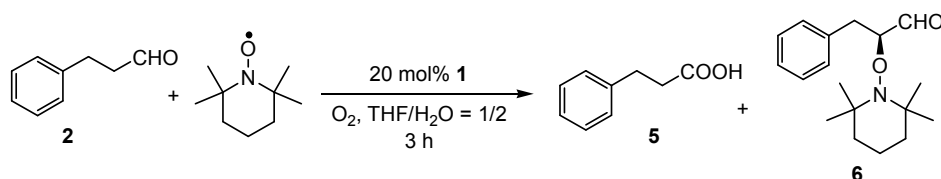

| Entry | Conditions                        | <b>2</b> : <b>5</b> : <b>6</b> |
|-------|-----------------------------------|--------------------------------|
| 1     | TEMPO (2 eq), CuCl (0.3 eq), 0 °C | 5 : 73 : 22                    |
| 2     | TEMPO (4 eq), CuCl (0.1 eq), rt   | 14 : 40 : 46                   |
| 3     | TEMPO (4 eq), CuCl (0.3 eq), rt   | 0 : 32 : 68                    |

**Optimization of reaction conditions for tandem reaction starting from alcohol:** The ratio of starting alcohol **4**, aldehyde **2**, carboxylic acid **5**, and desired product **6** was analyzed by  $^1\text{H}$  NMR measurement of crude mixtures.

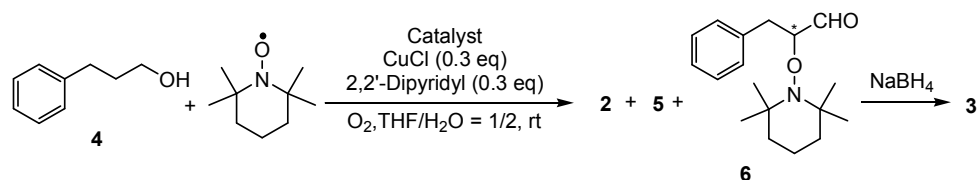

| Entry | Catalyst           | TEMPO | Concentration of <b>4</b> | Time | <b>4</b> : <b>2</b> : <b>5</b> : <b>6</b> | <b>3</b>                       |
|-------|--------------------|-------|---------------------------|------|-------------------------------------------|--------------------------------|
| 1     | <b>1</b> (0.05 eq) | 2 eq  | 0.4 M                     | 24 h | 23 : 6 : 50 : 21                          | 13% yield, 89% ee [ <i>S</i> ] |
| 2     | <b>1</b> (0.2 eq)  | 4 eq  | 0.2 M                     | 24 h | 5 : 0 : 22 : 73                           | 57% yield, 90% ee [ <i>S</i> ] |
| 3     | <b>1</b> (0.2 eq)  | 4 eq  | 0.1 M                     | 24 h | 12 : 0 : 12 : 76                          | 62% yield, 93% ee [ <i>S</i> ] |
| 4     | <b>1</b> (0.2 eq)  | 4 eq  | 0.1 M                     | 36 h | not determined                            | 66% yield, 93% ee [ <i>S</i> ] |
| 5     | <b>7</b> (0.2 eq)  | 4 eq  | 0.1 M                     | 36 h | 31 : 7 : 34 : 28                          | 28% yield, 66% ee [ <i>R</i> ] |

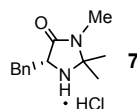

All products obtained in Table 2 are known compounds. Enantiomeric excesses and the absolute configurations of products **3a-f** were determined according to the literature.<sup>6</sup>

$^1\text{H}$  NMR spectra

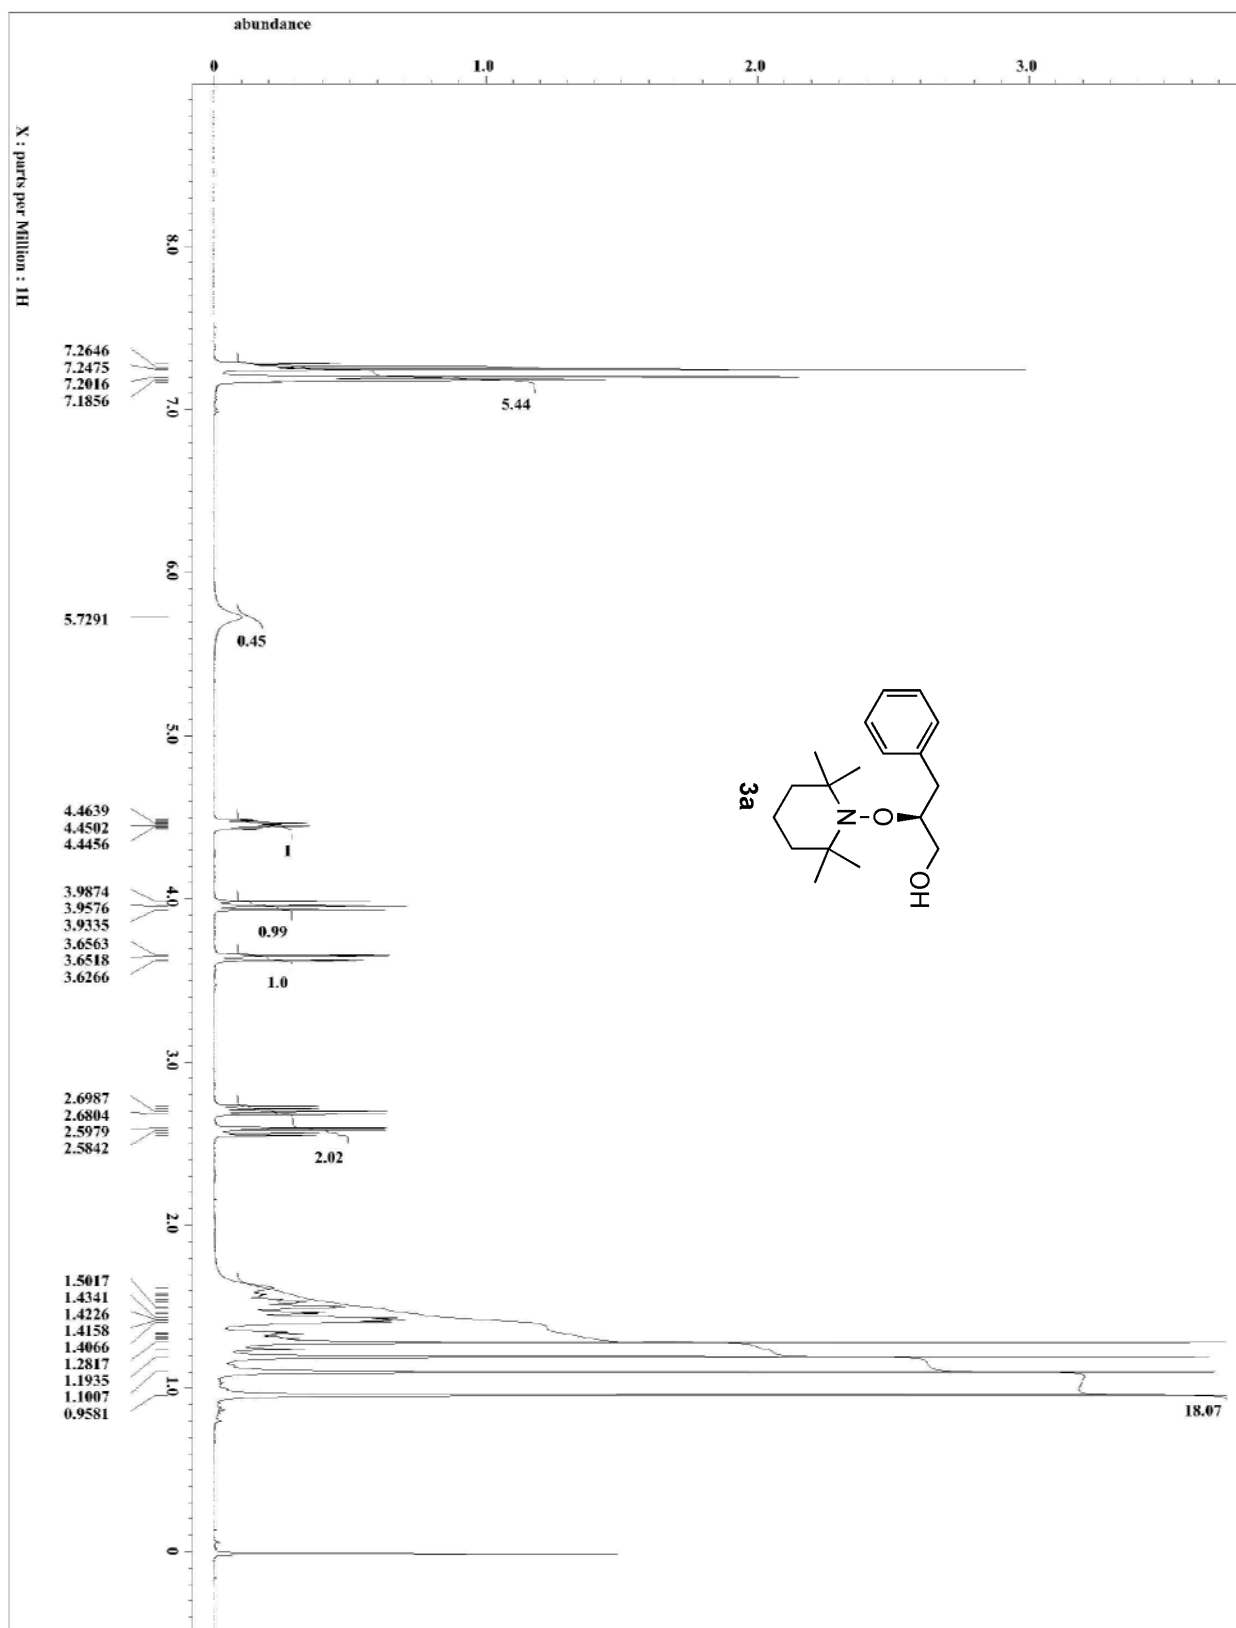

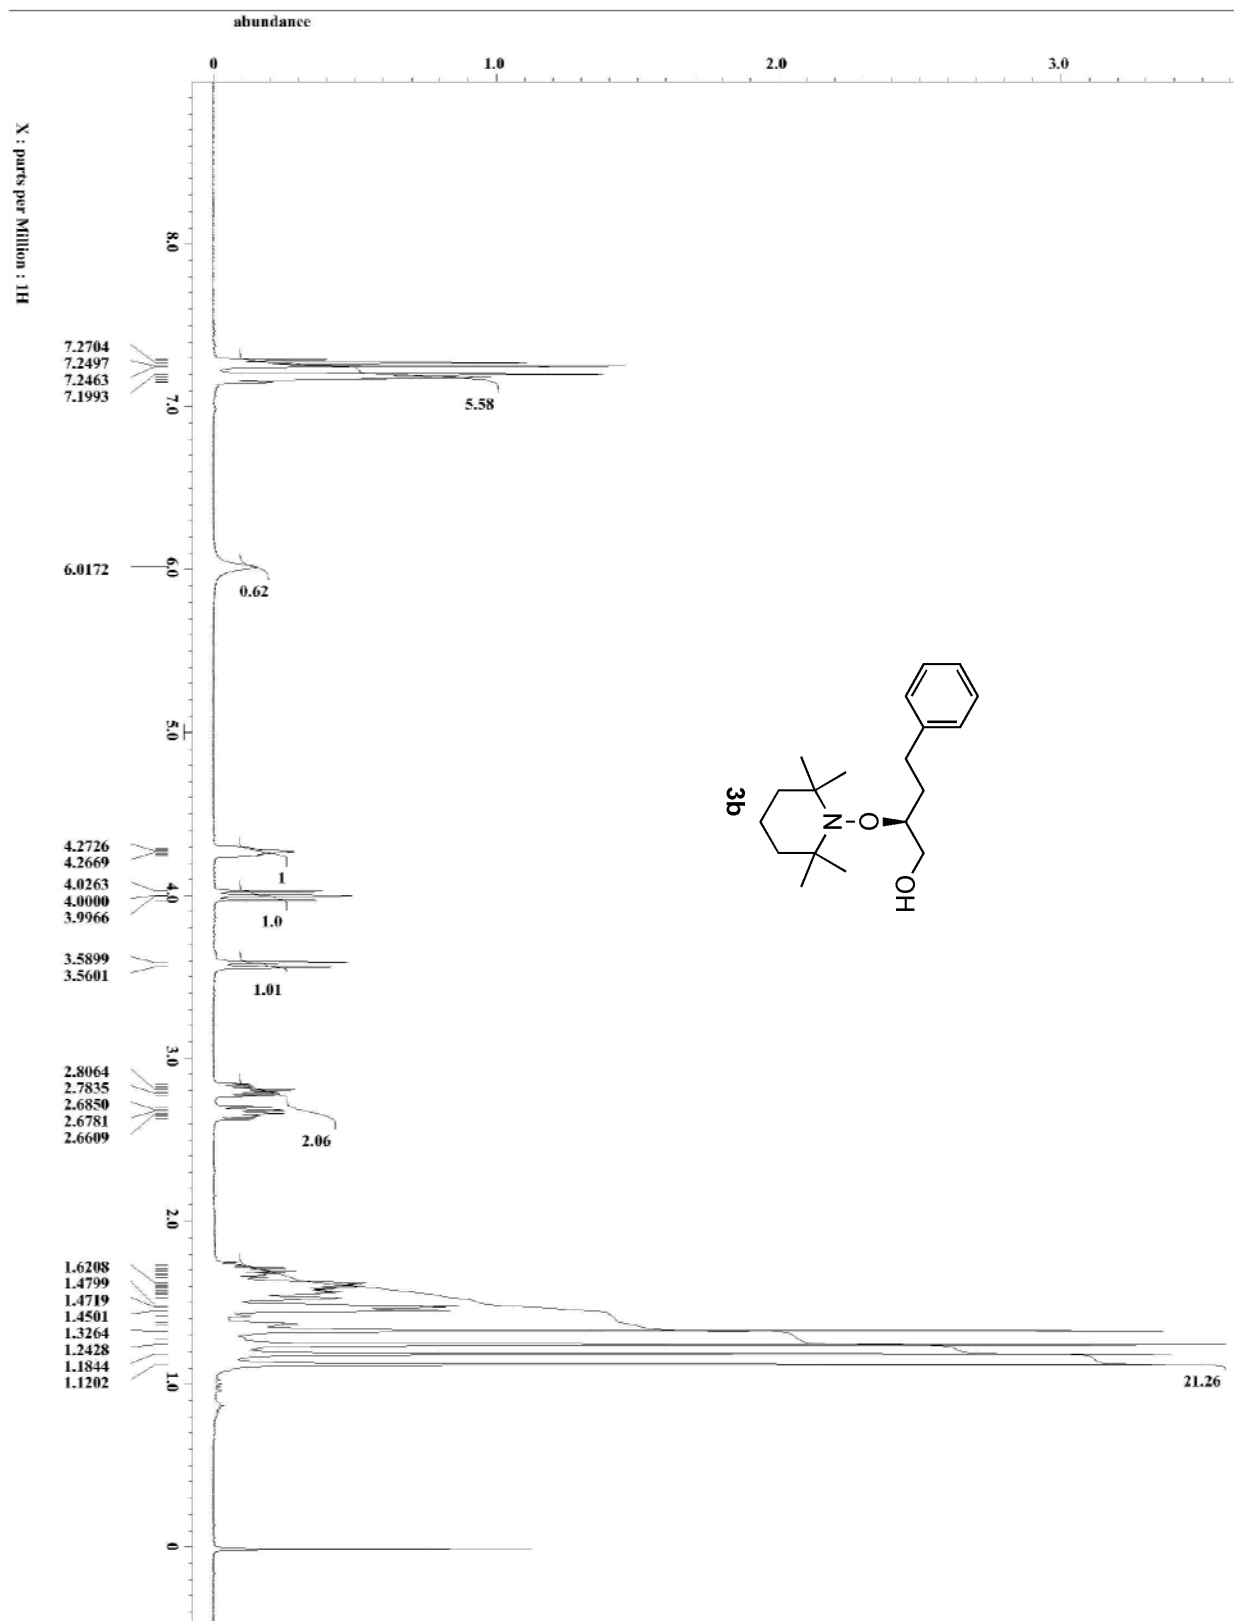

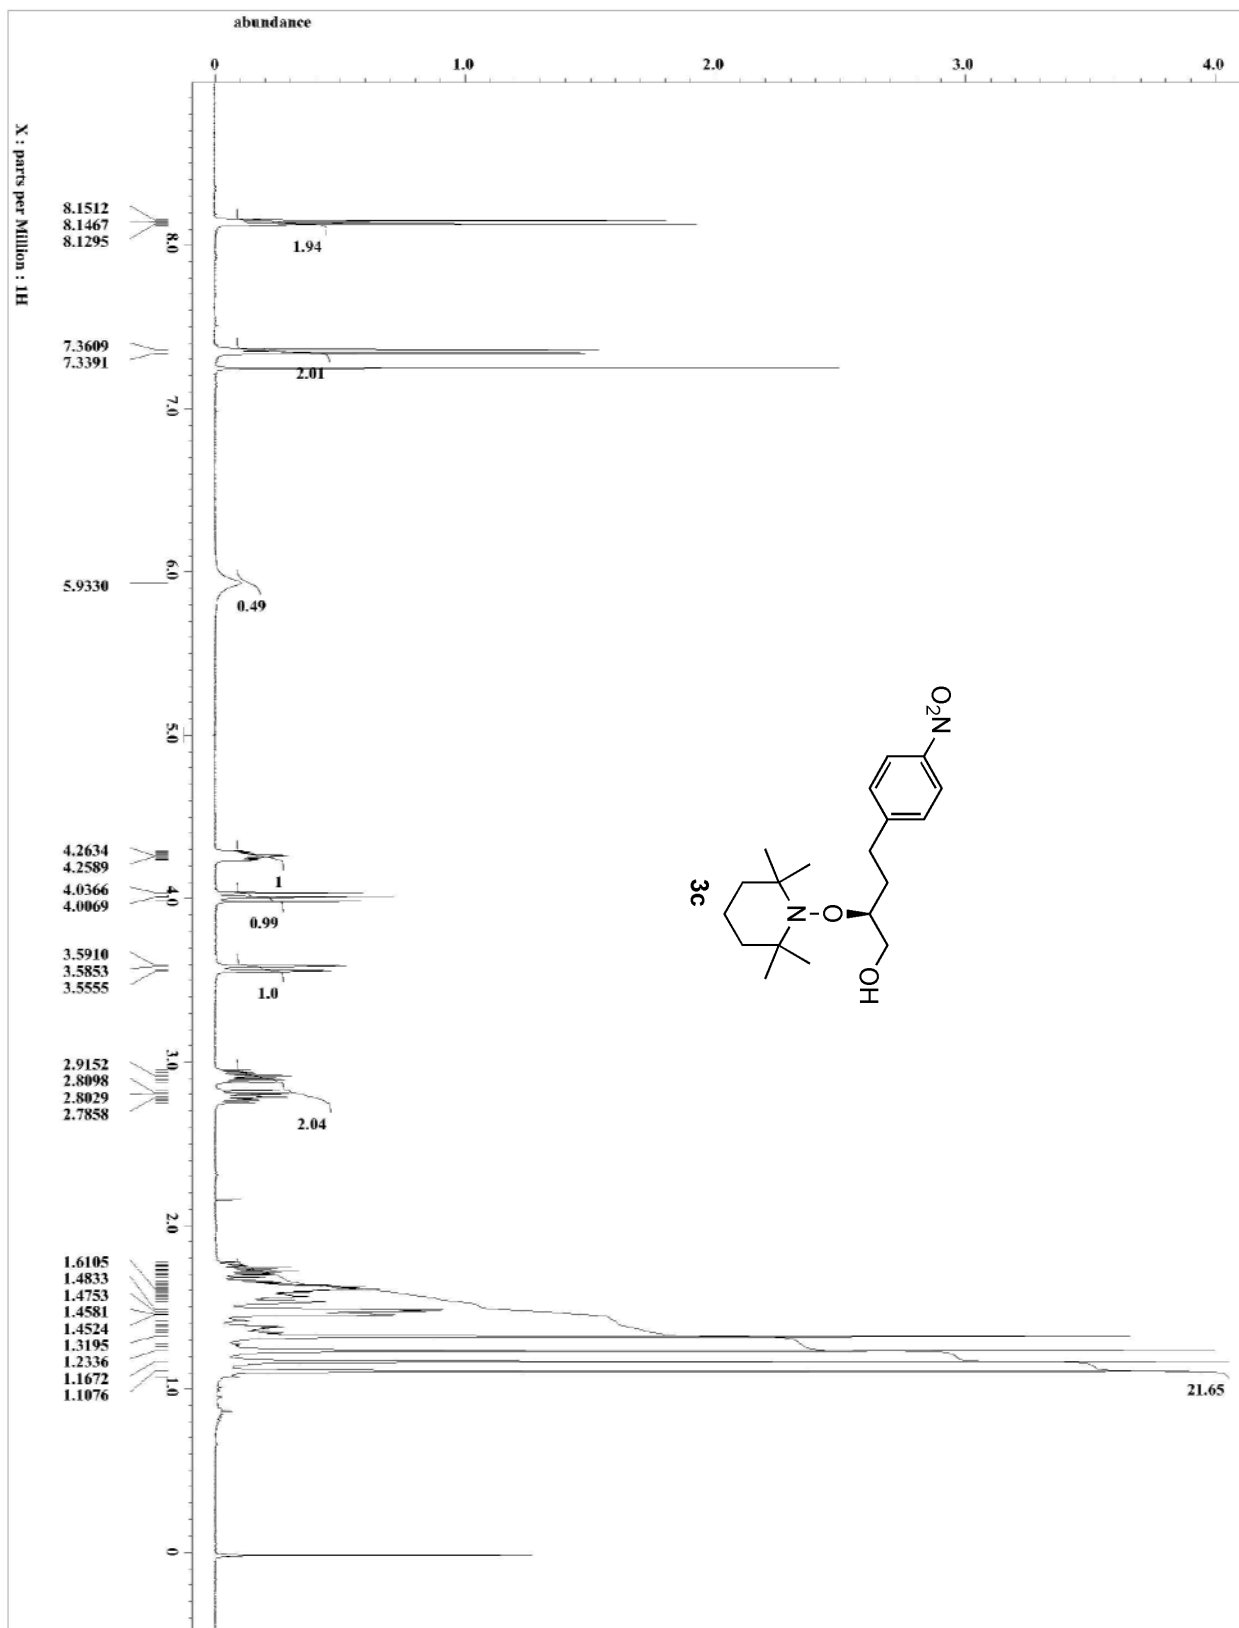

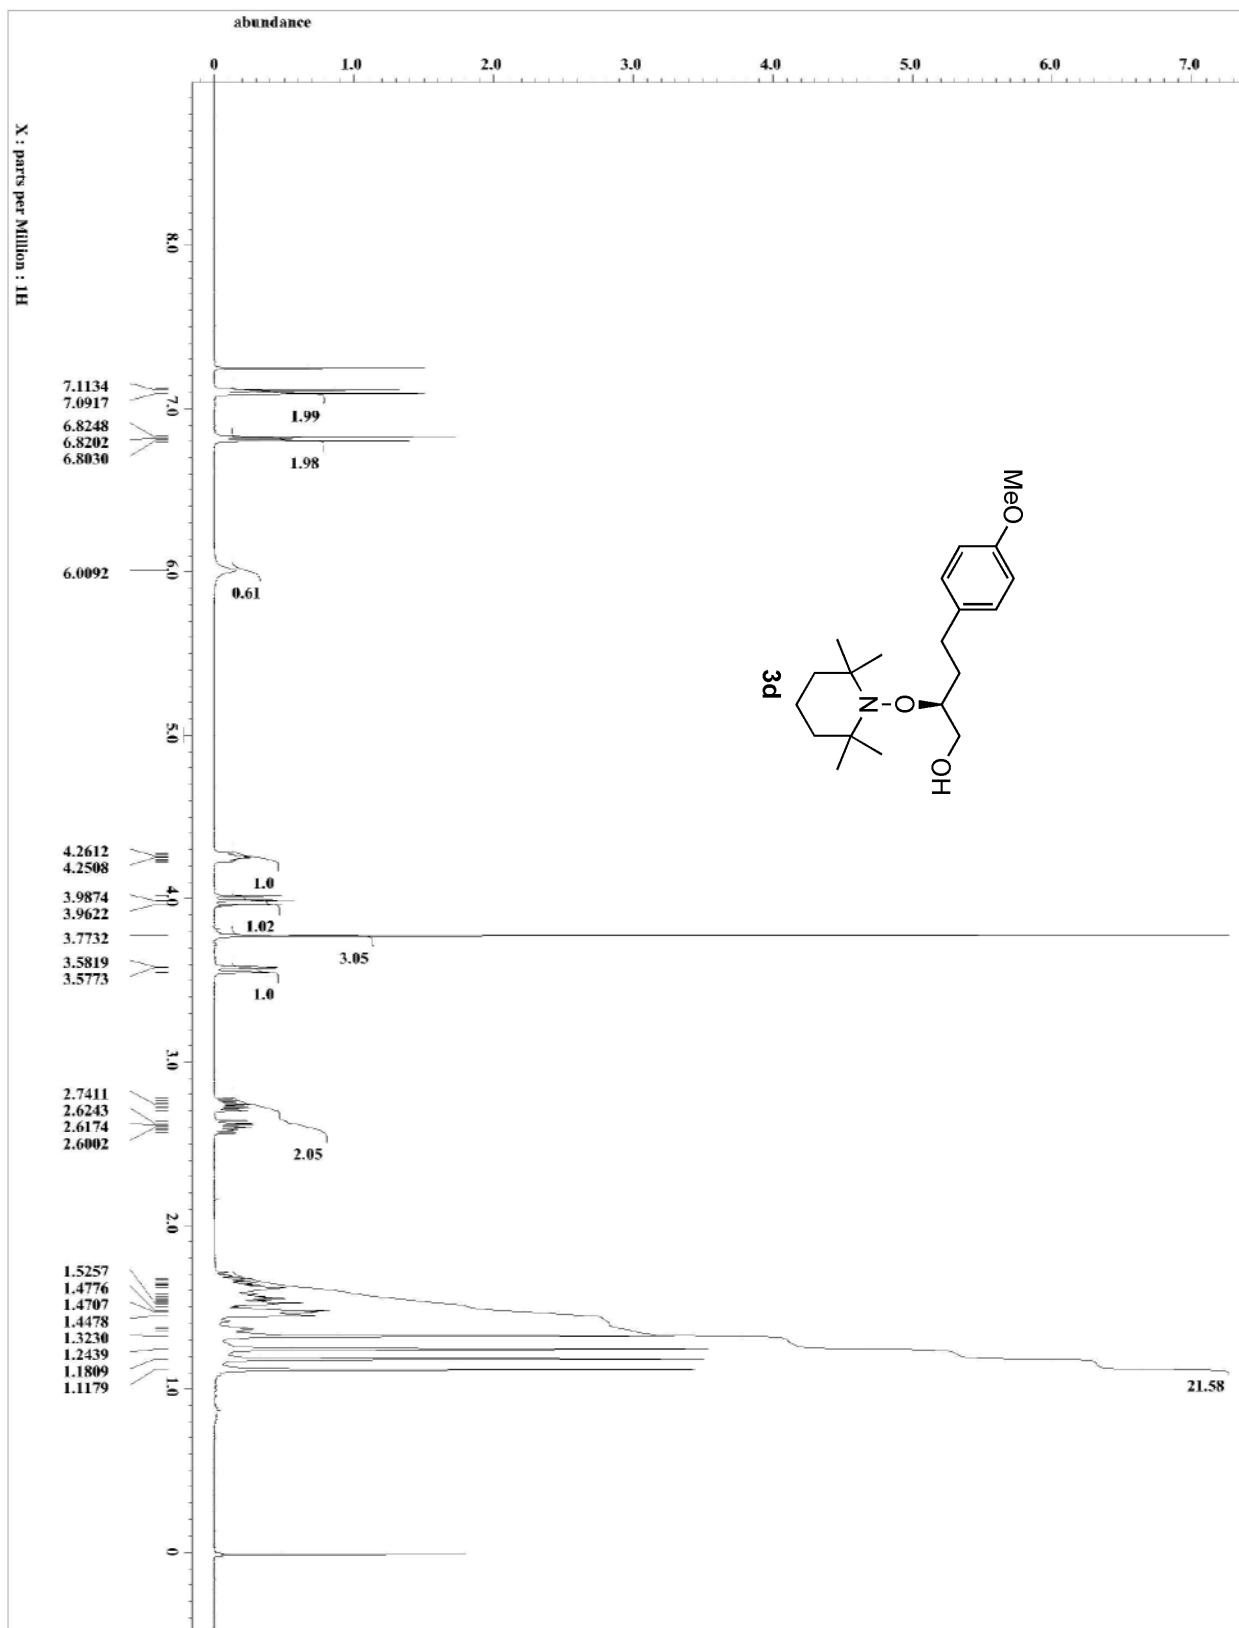

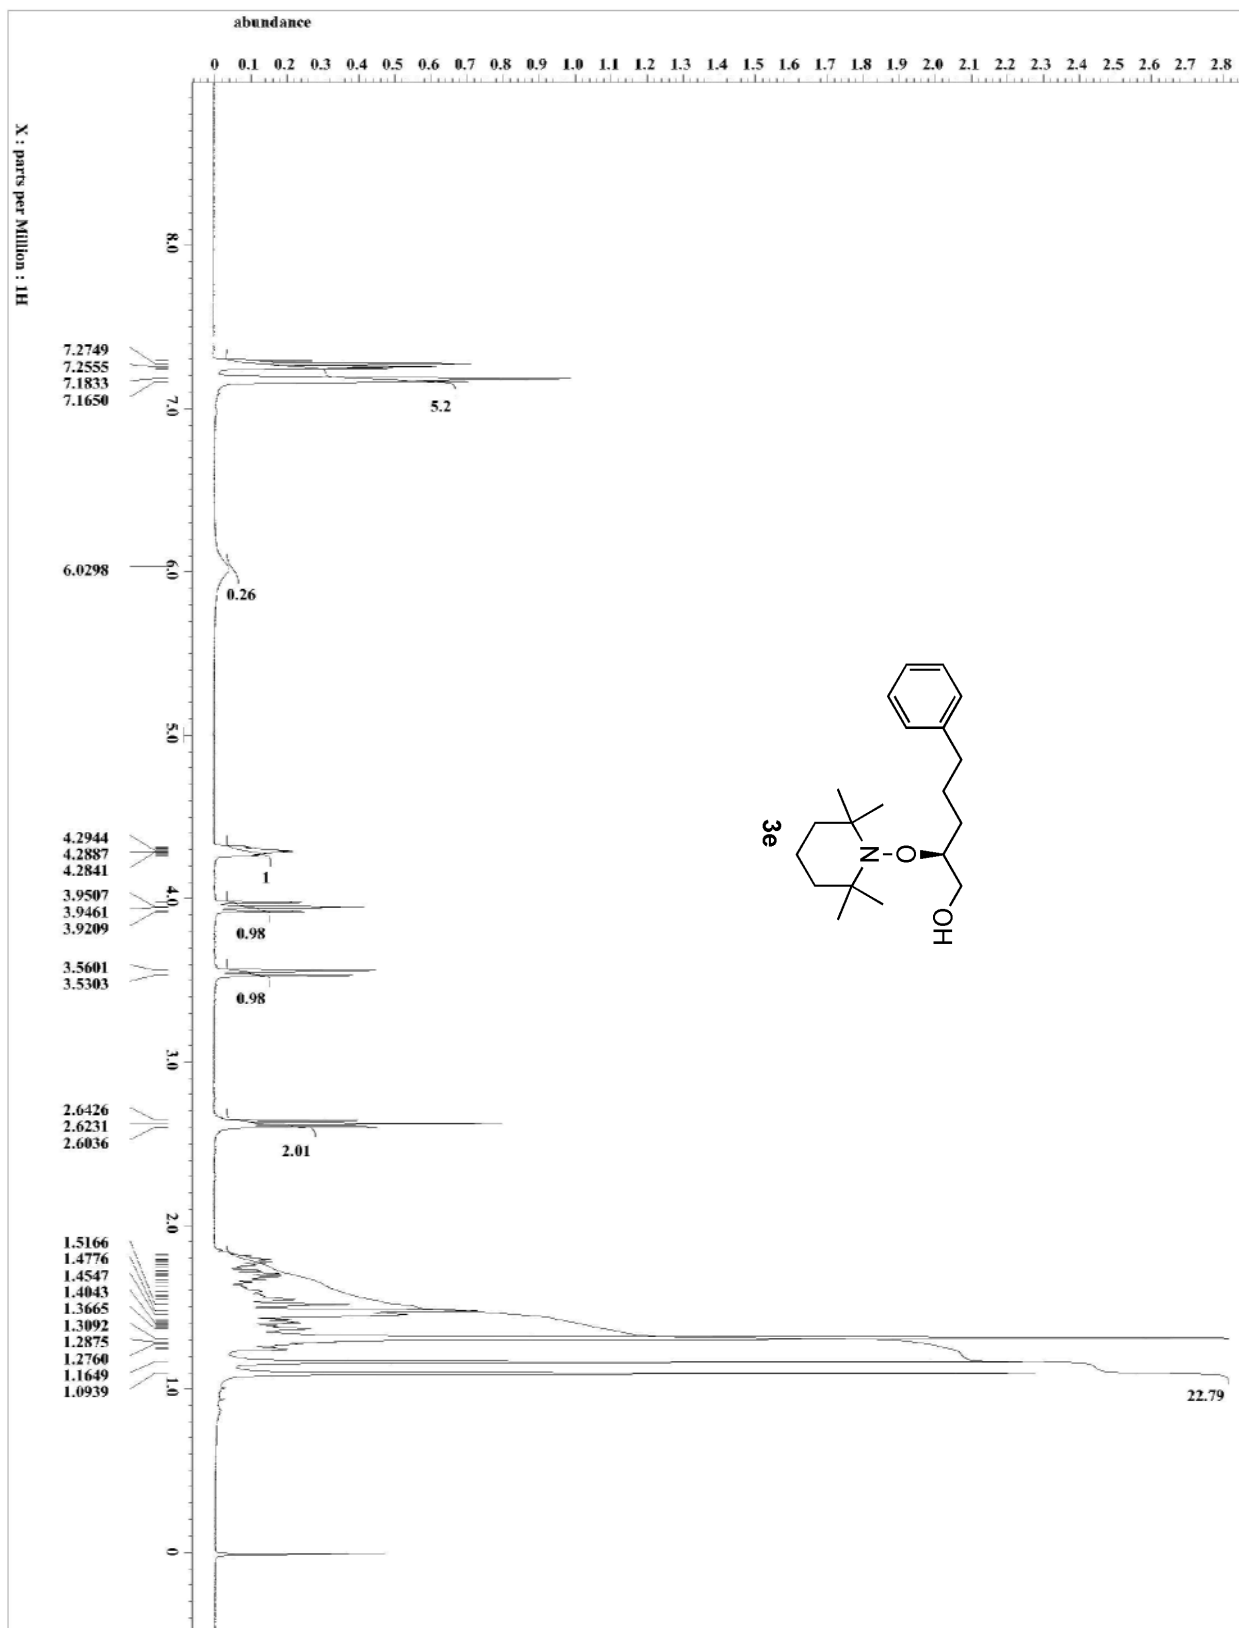

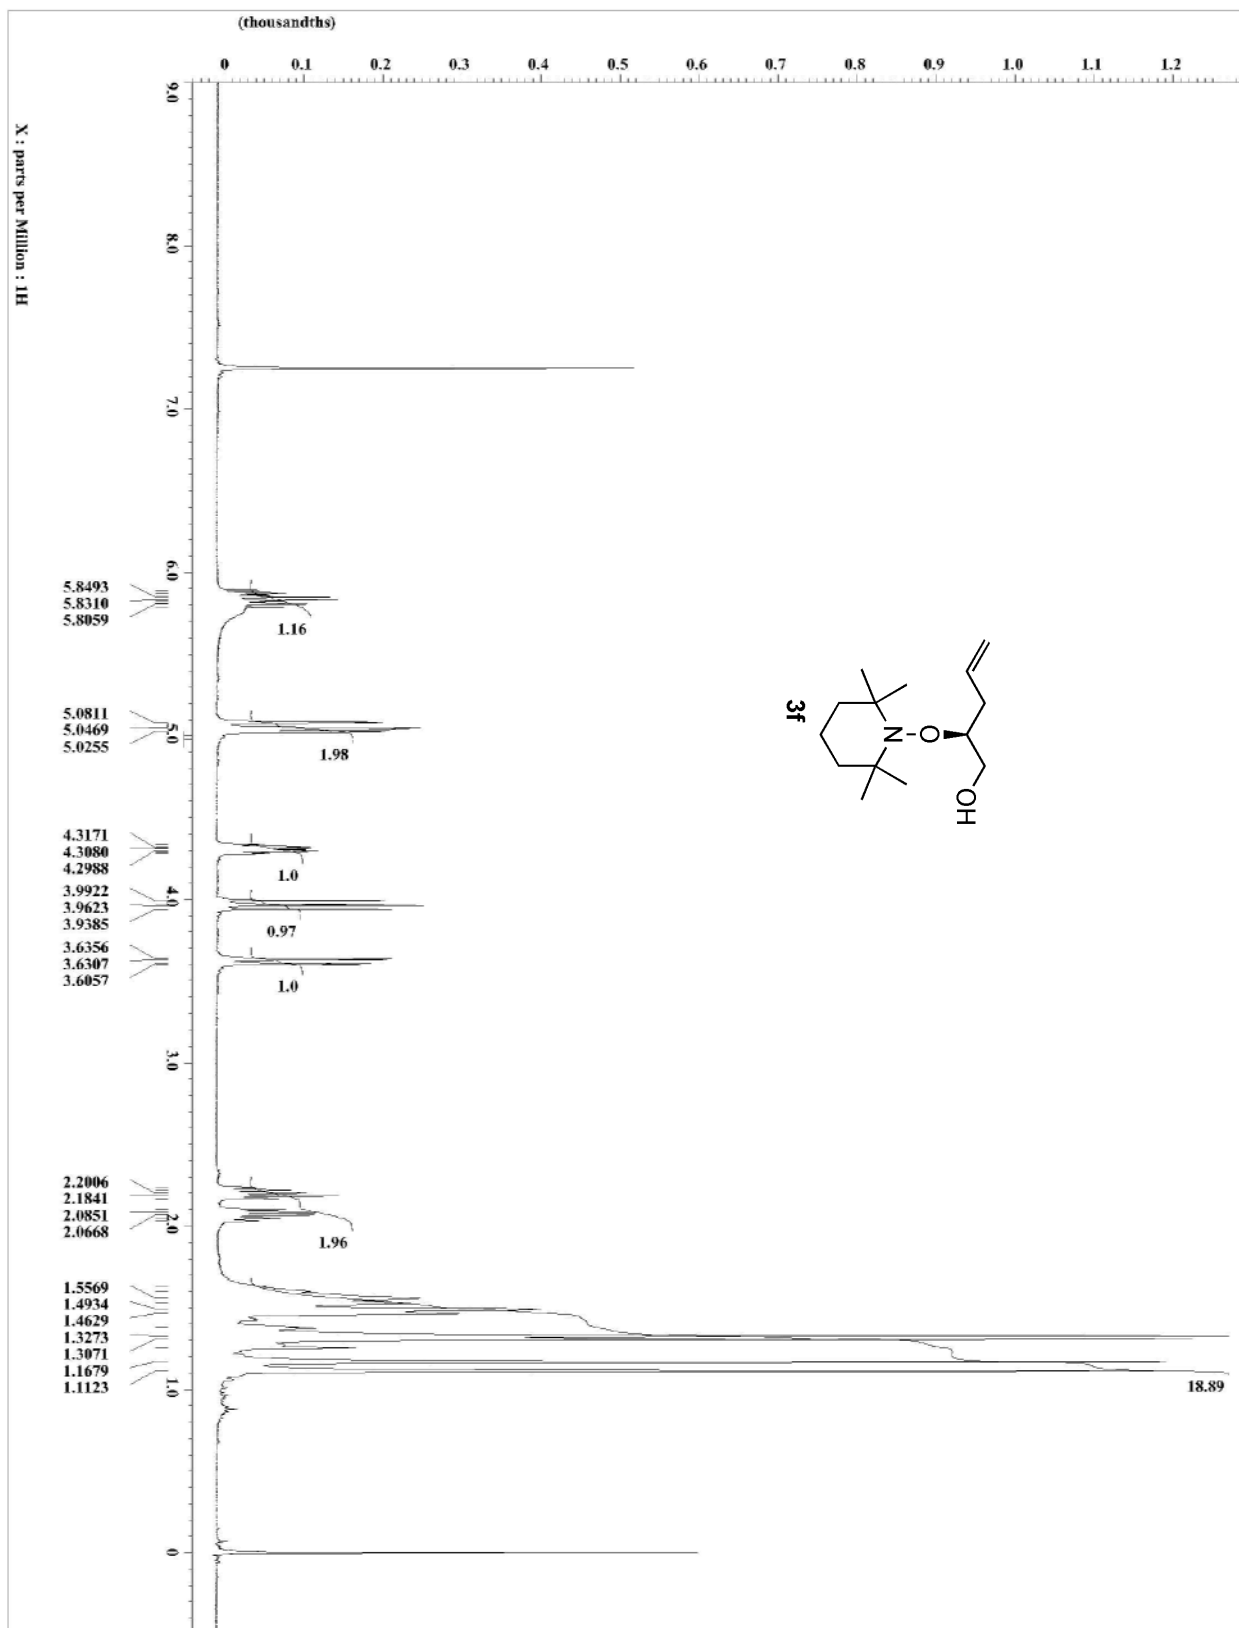



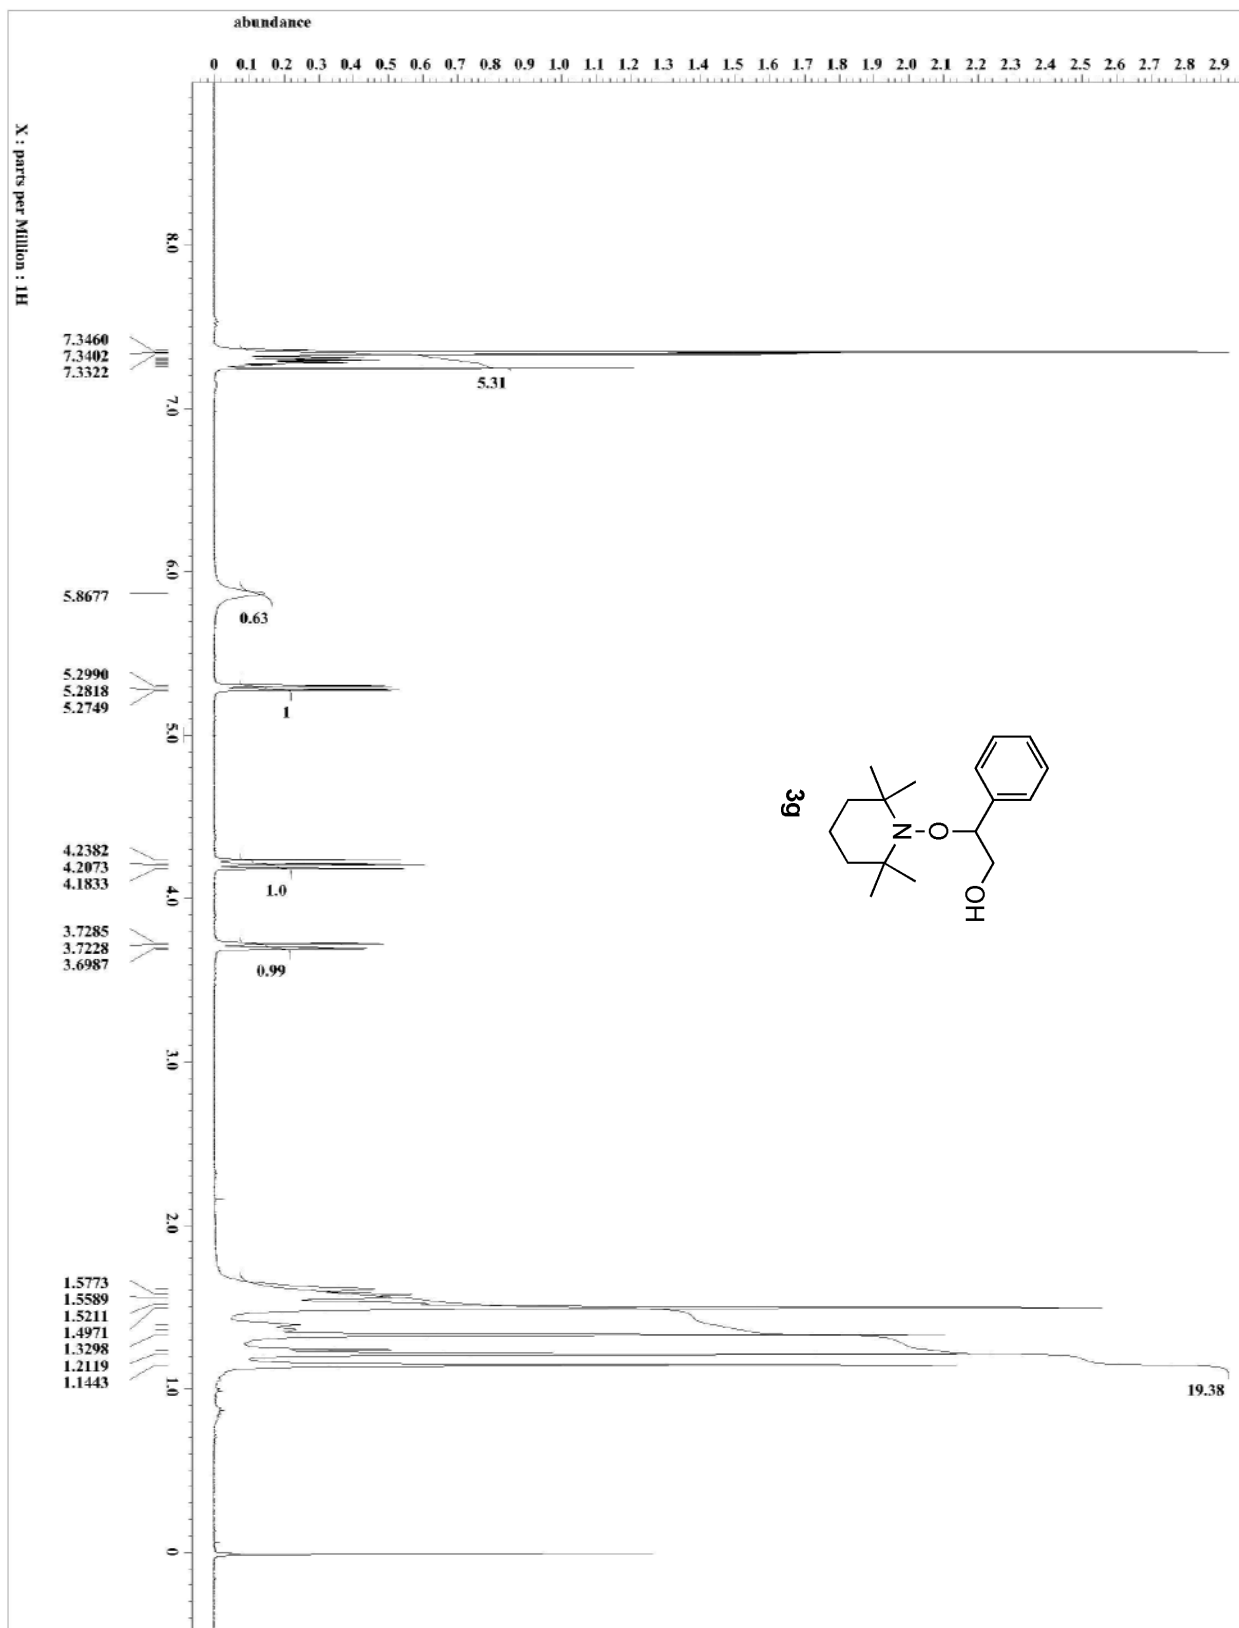

$^{13}\text{C}$  NMR spectra

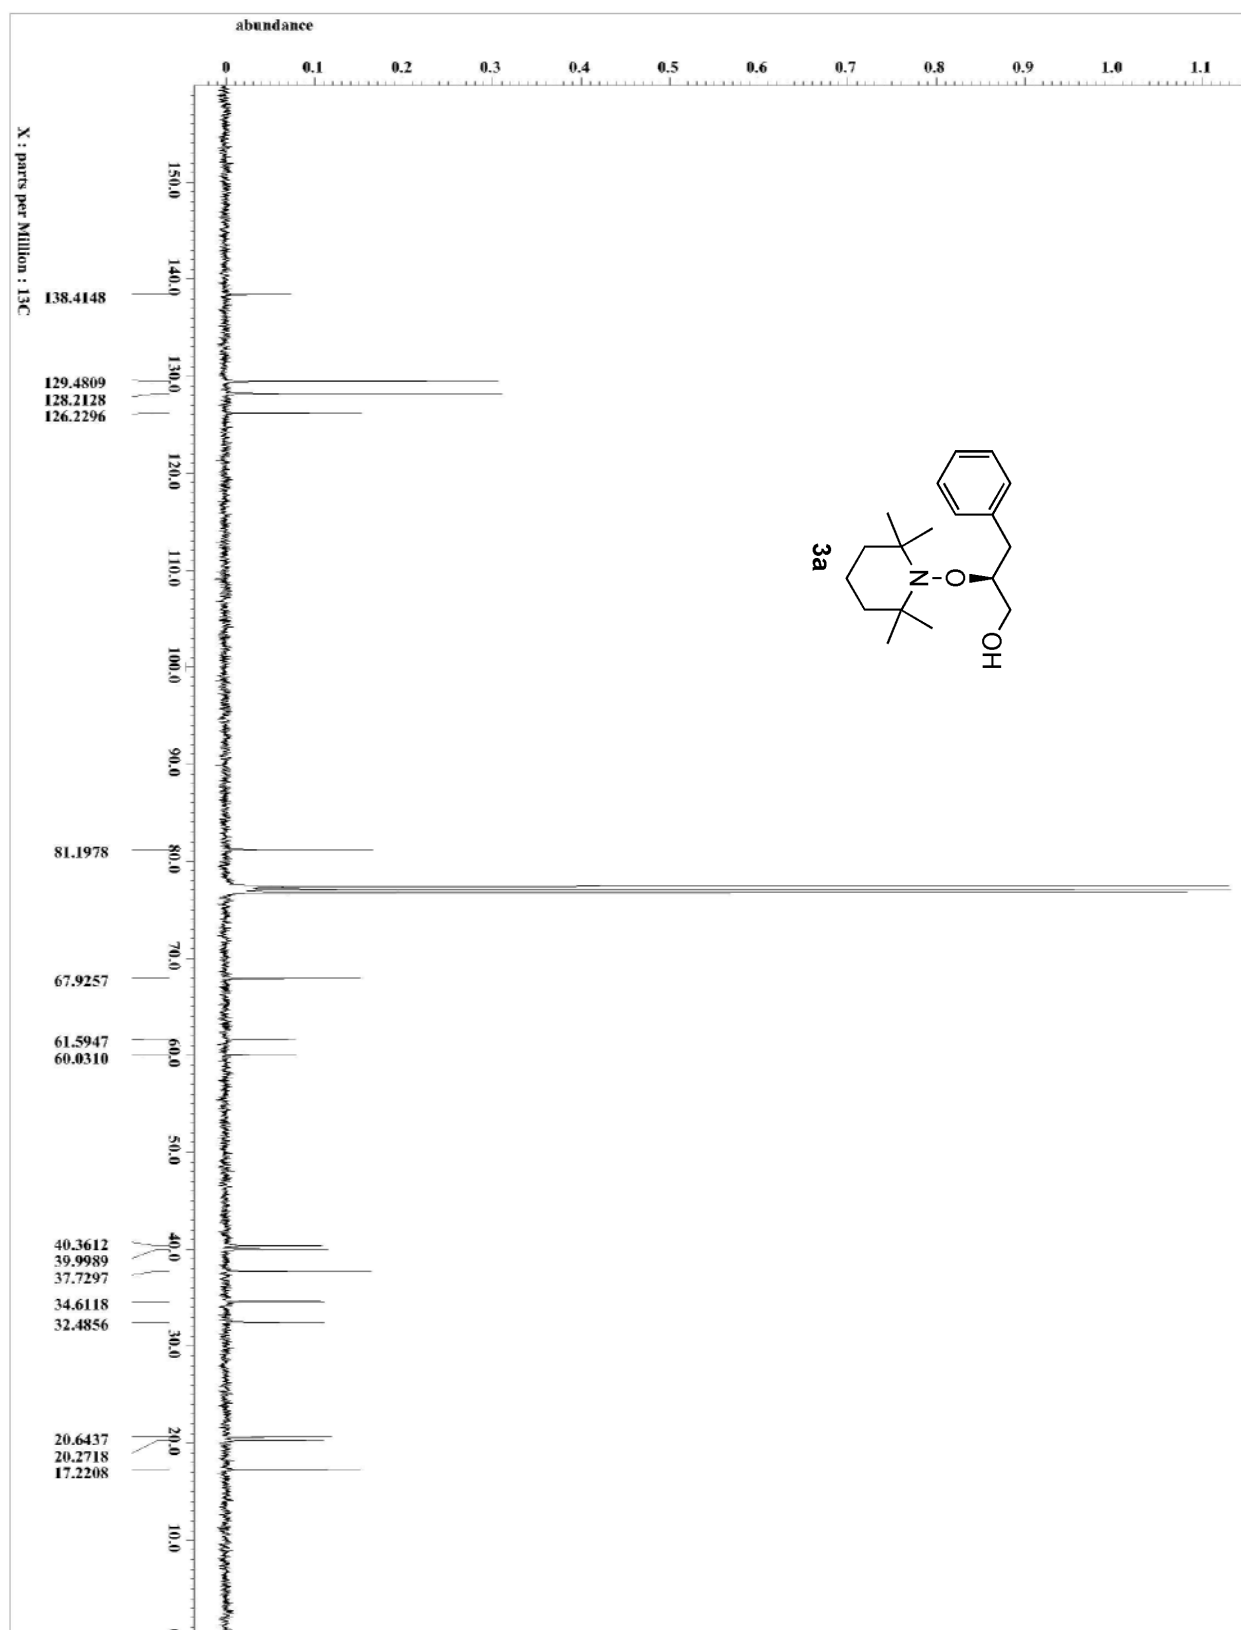

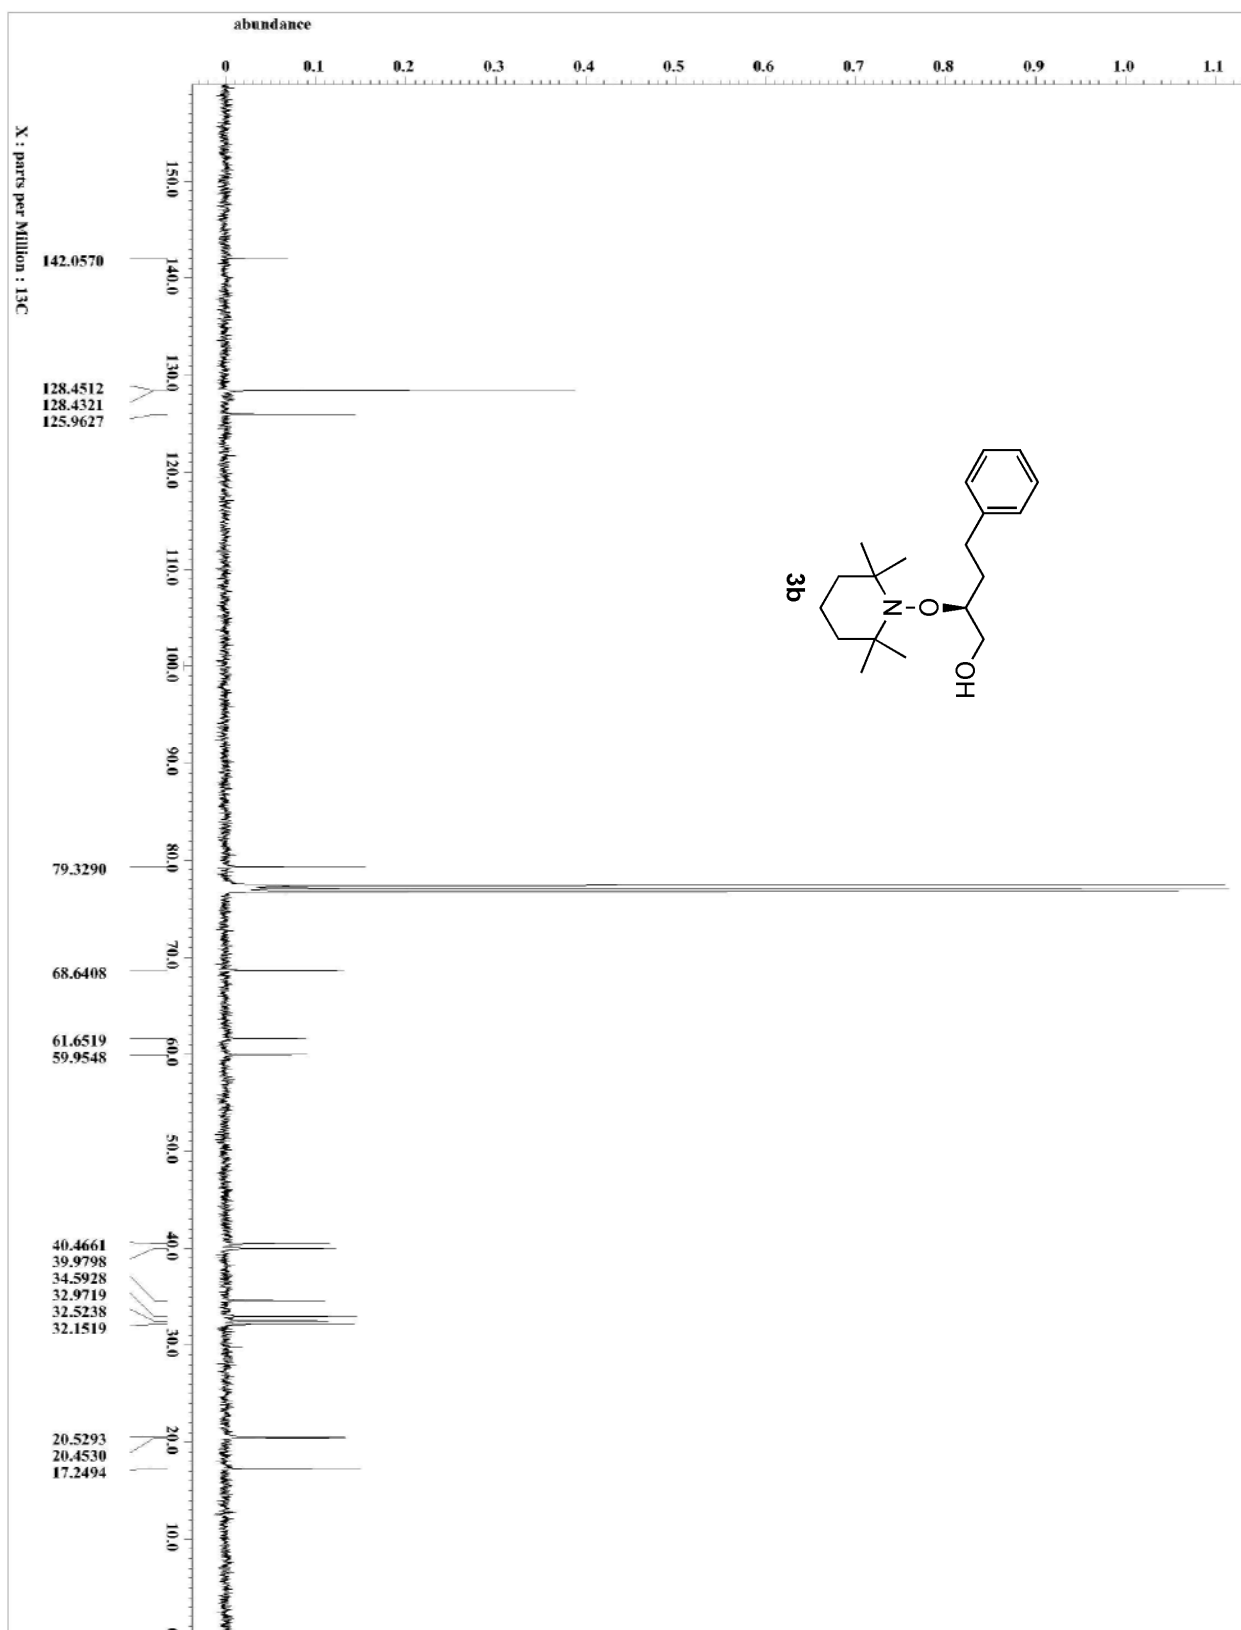

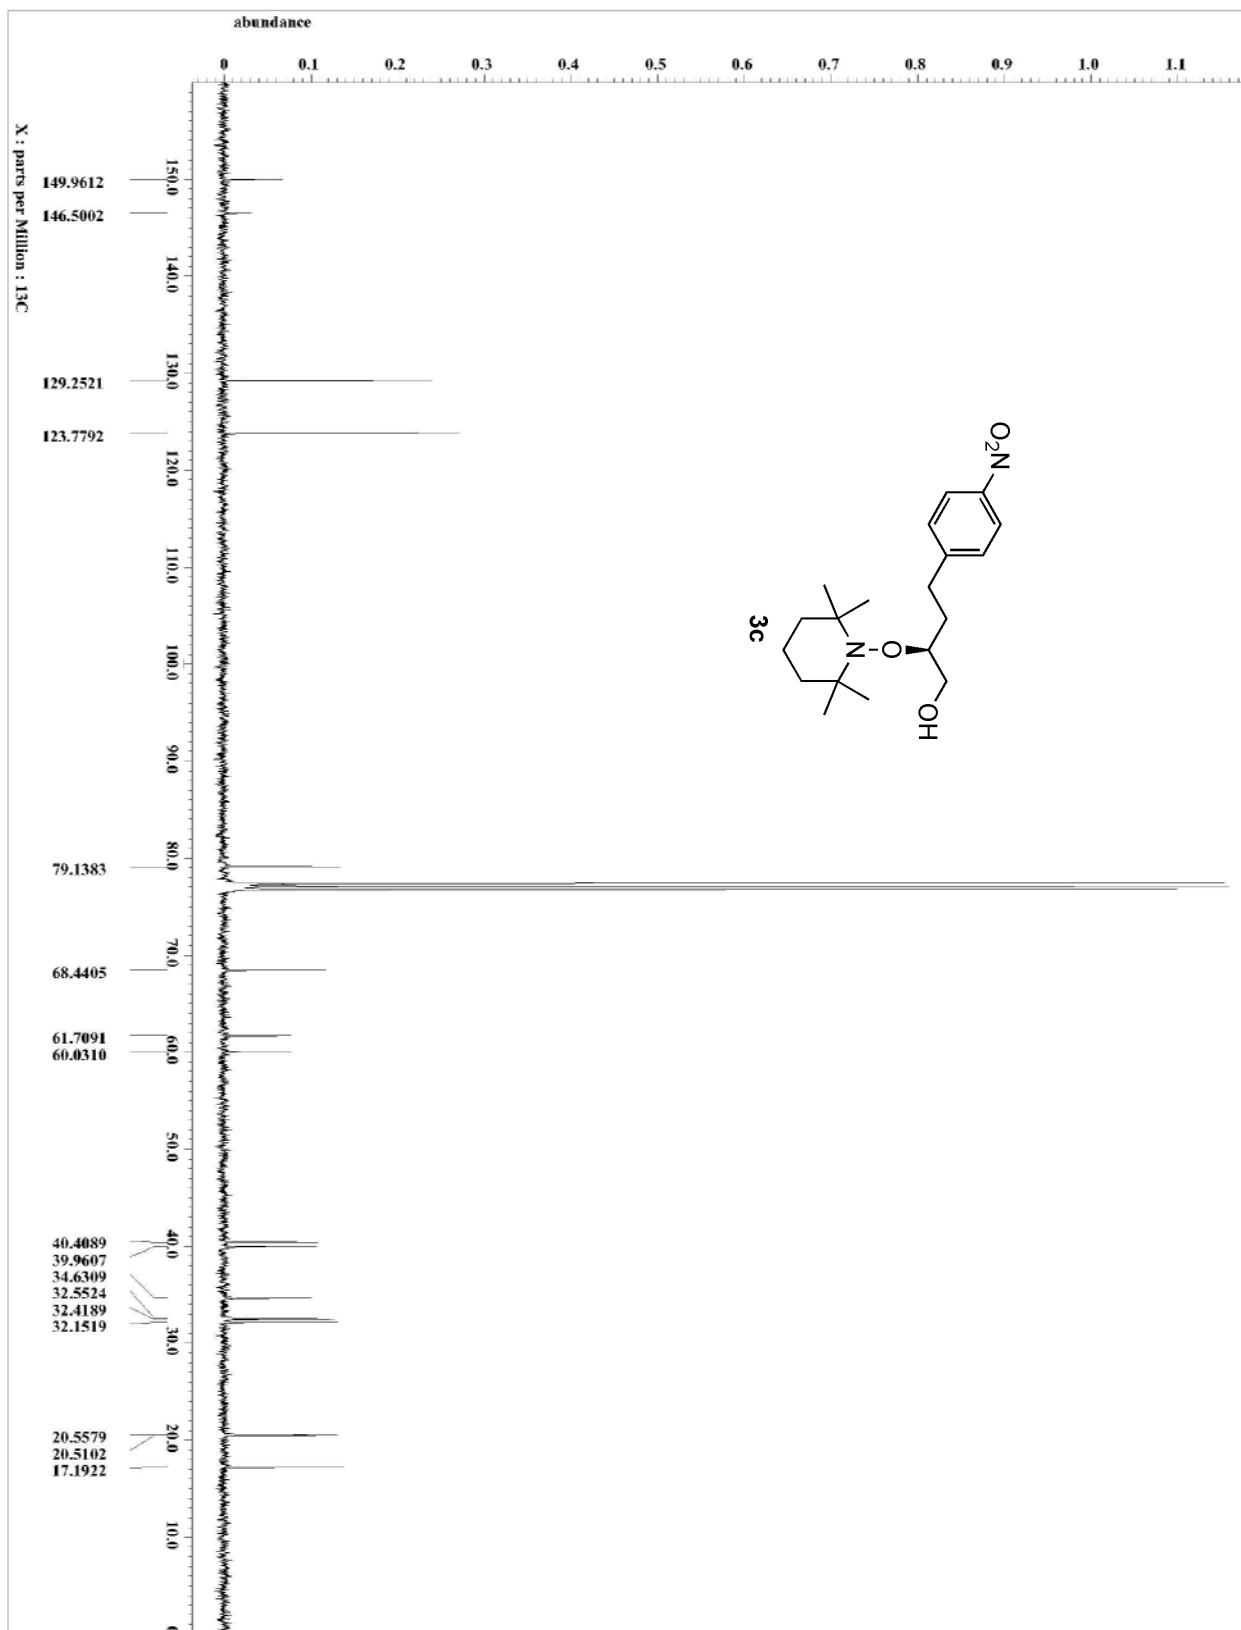

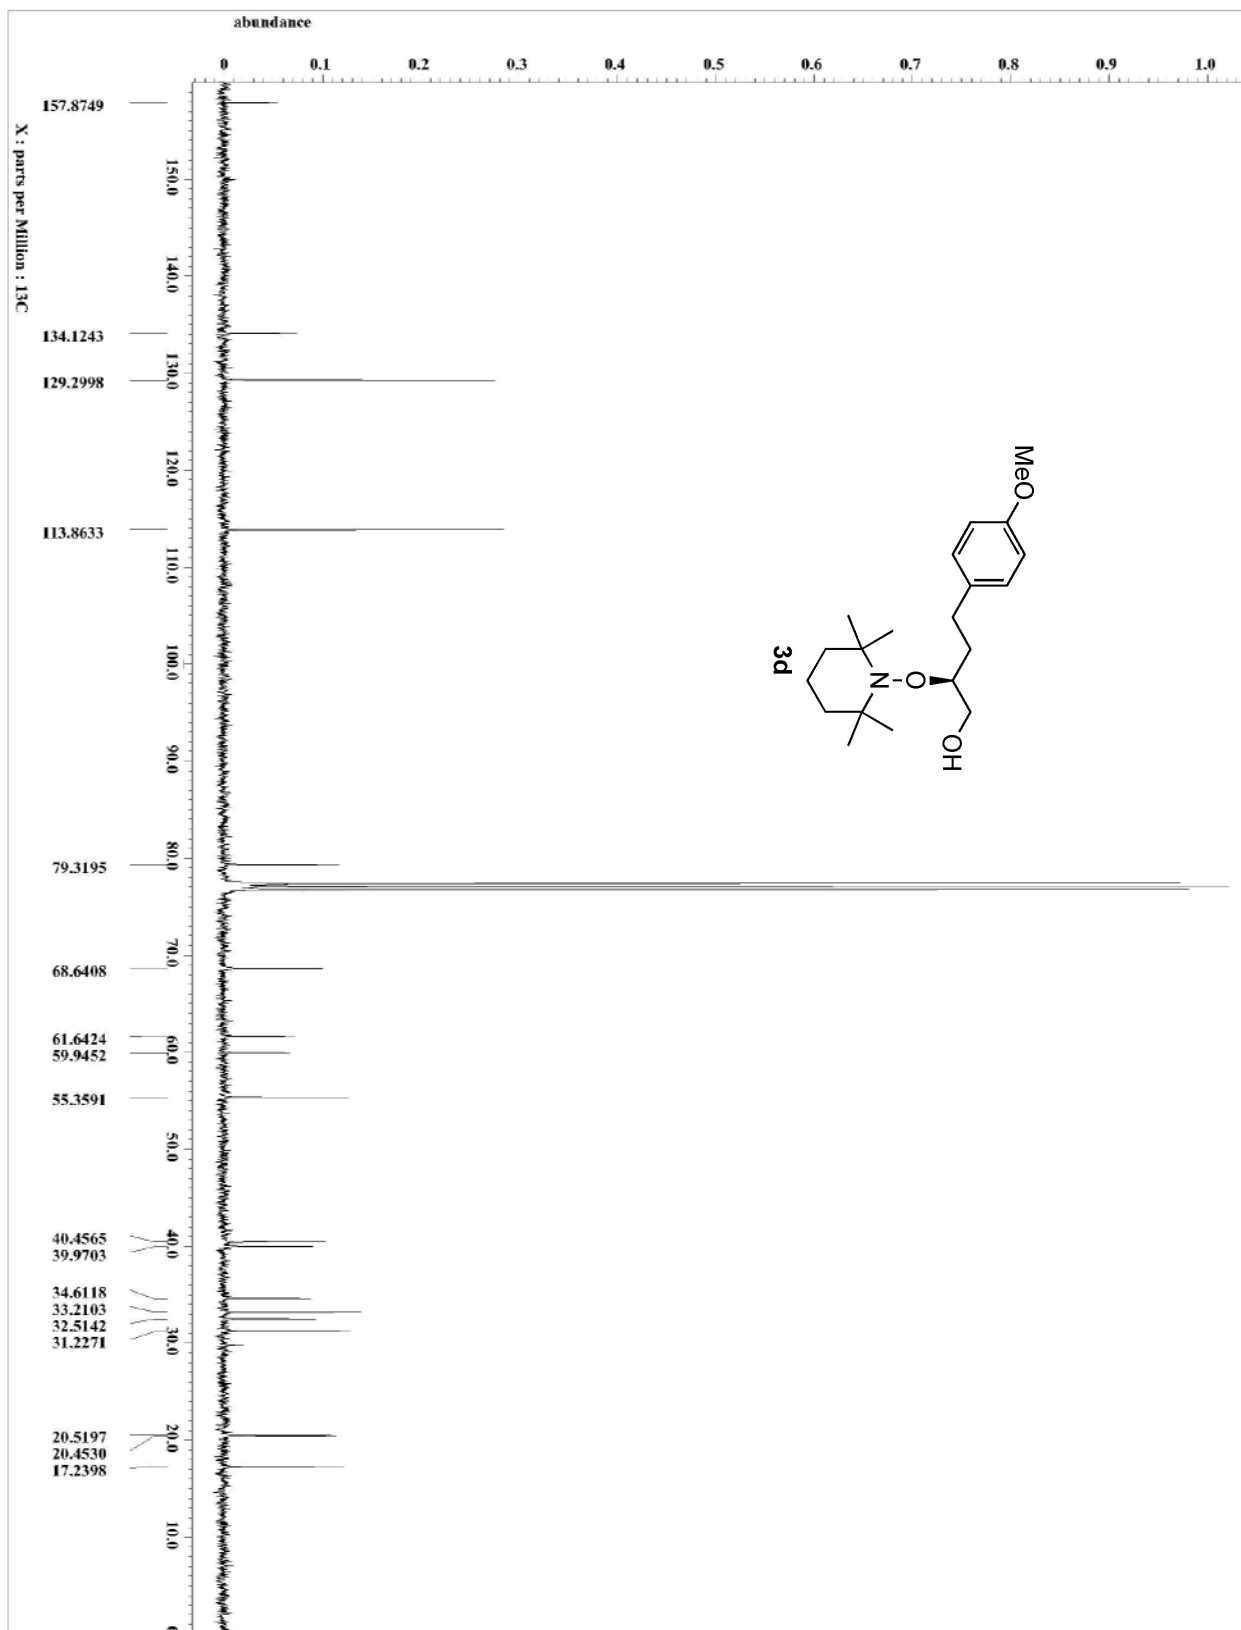

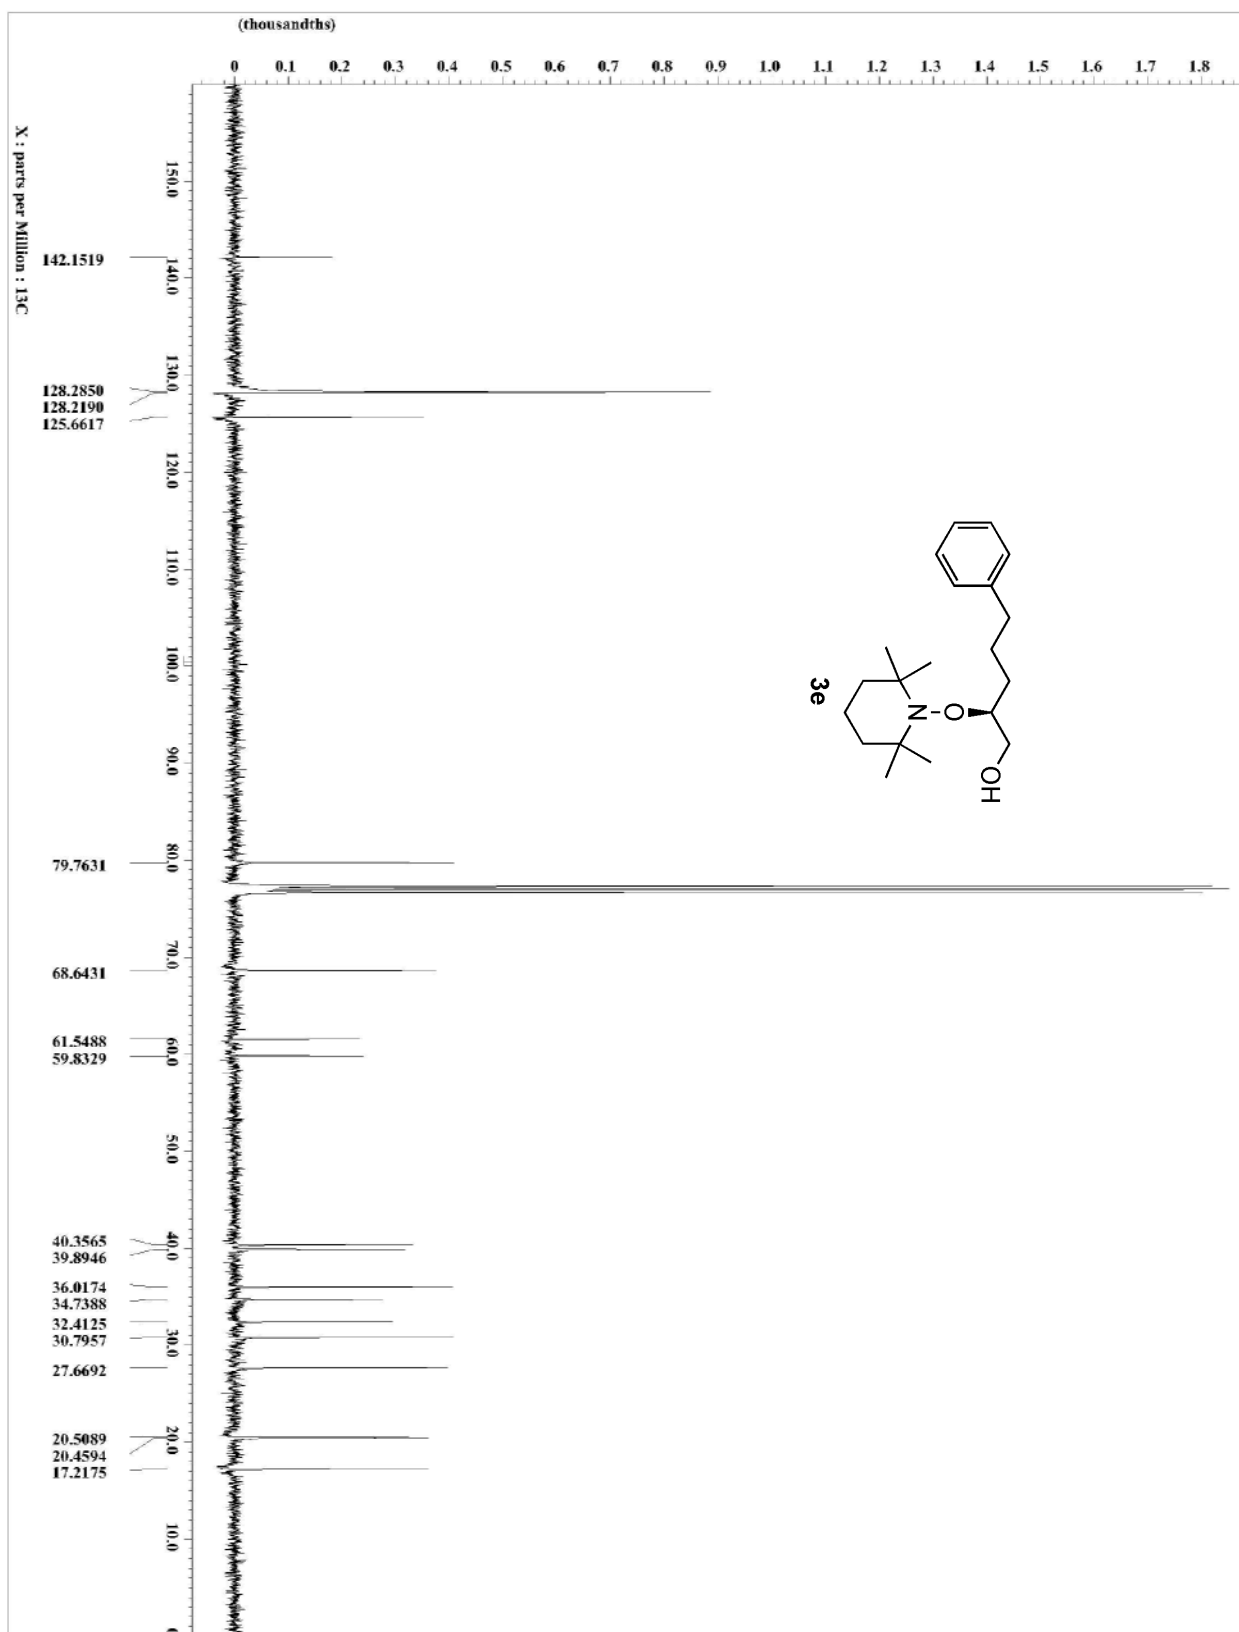

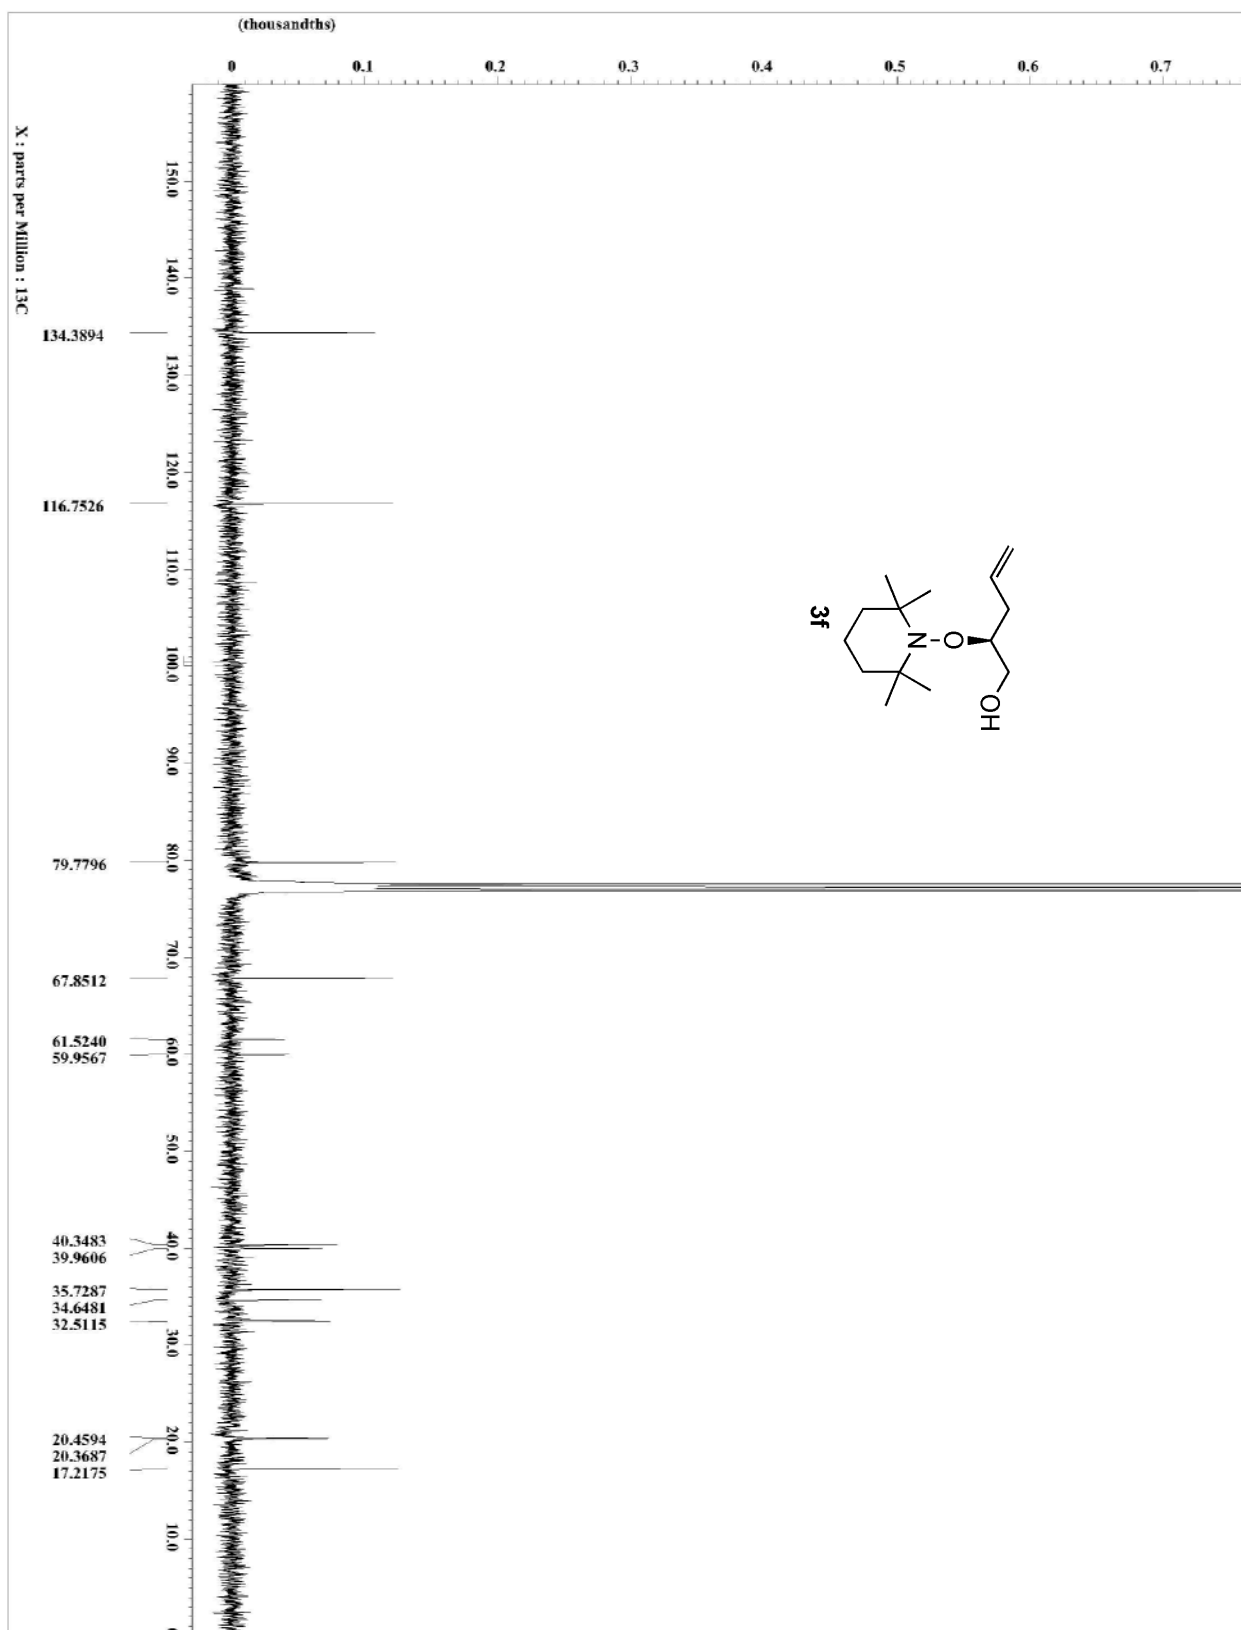

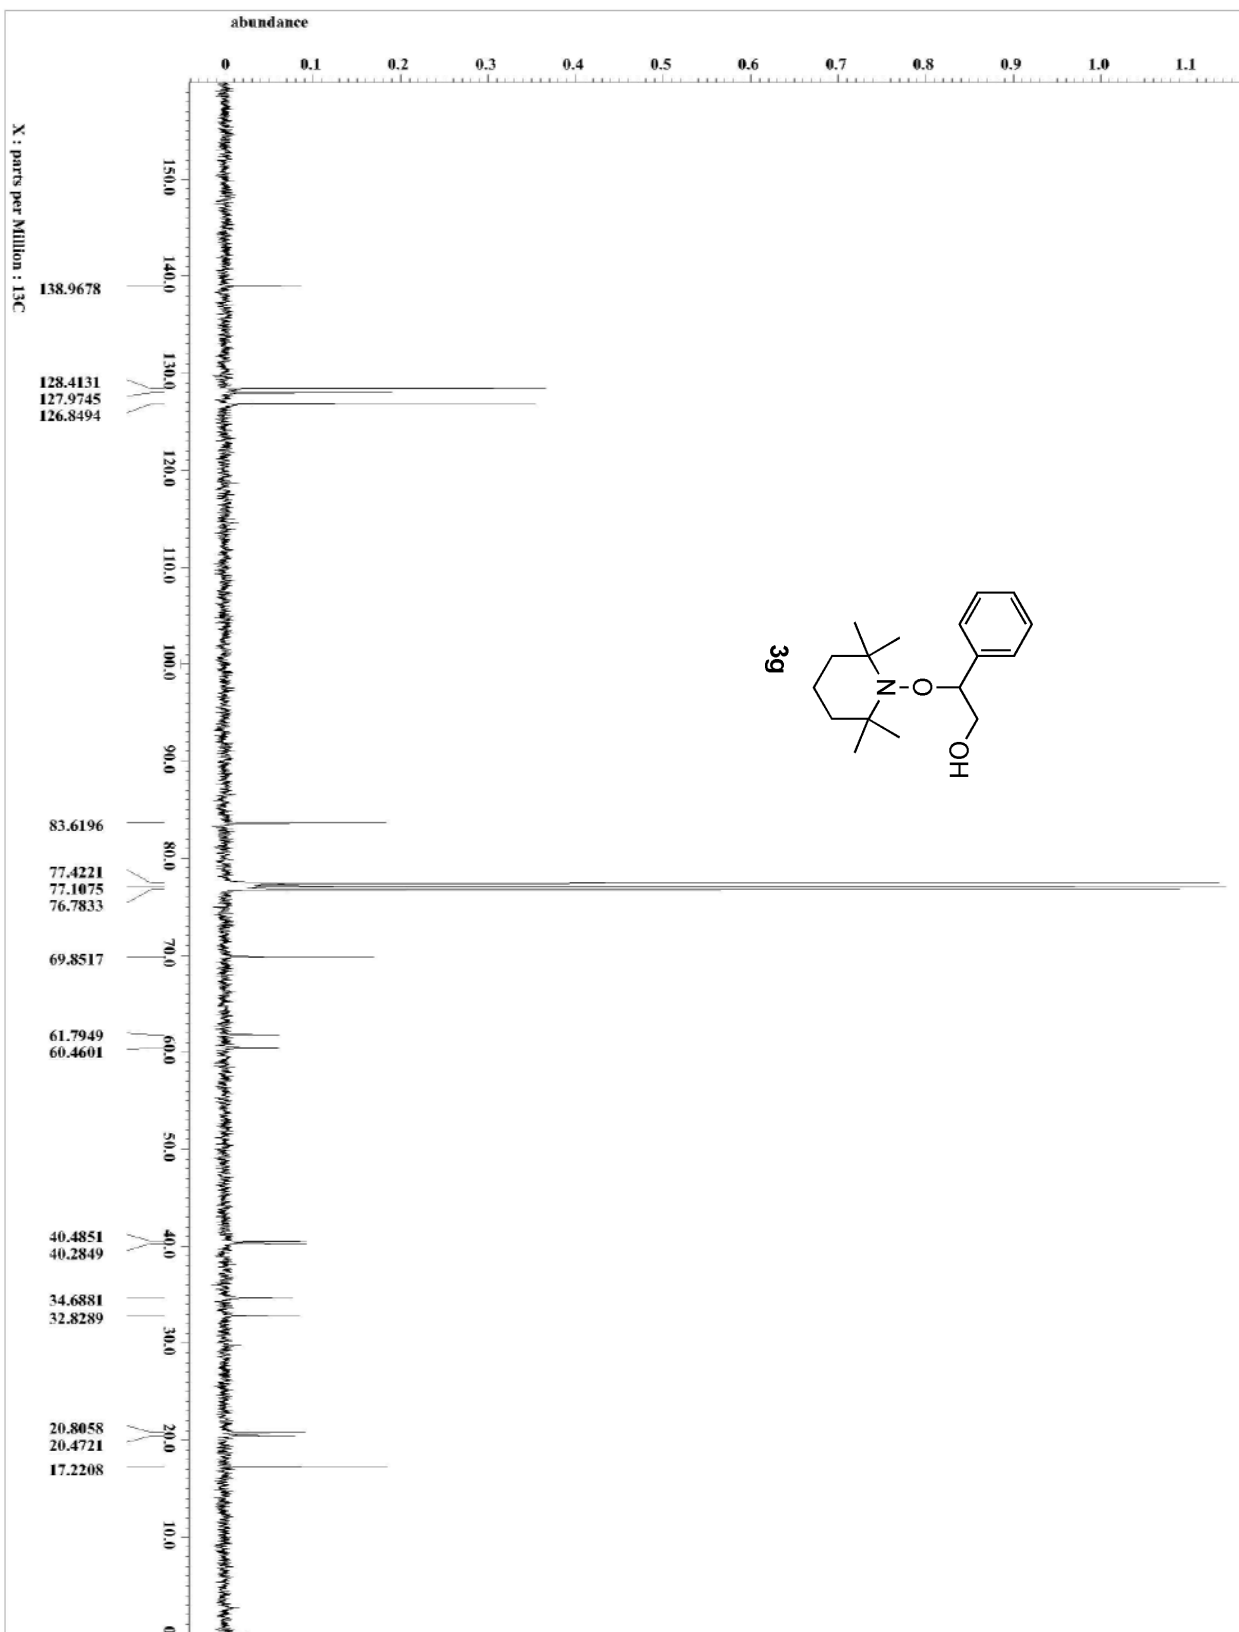



# HPLC analyses

Chiralcel OD-H column, hexane/2-propanol = 98/2, 1.0 mL min<sup>-1</sup>

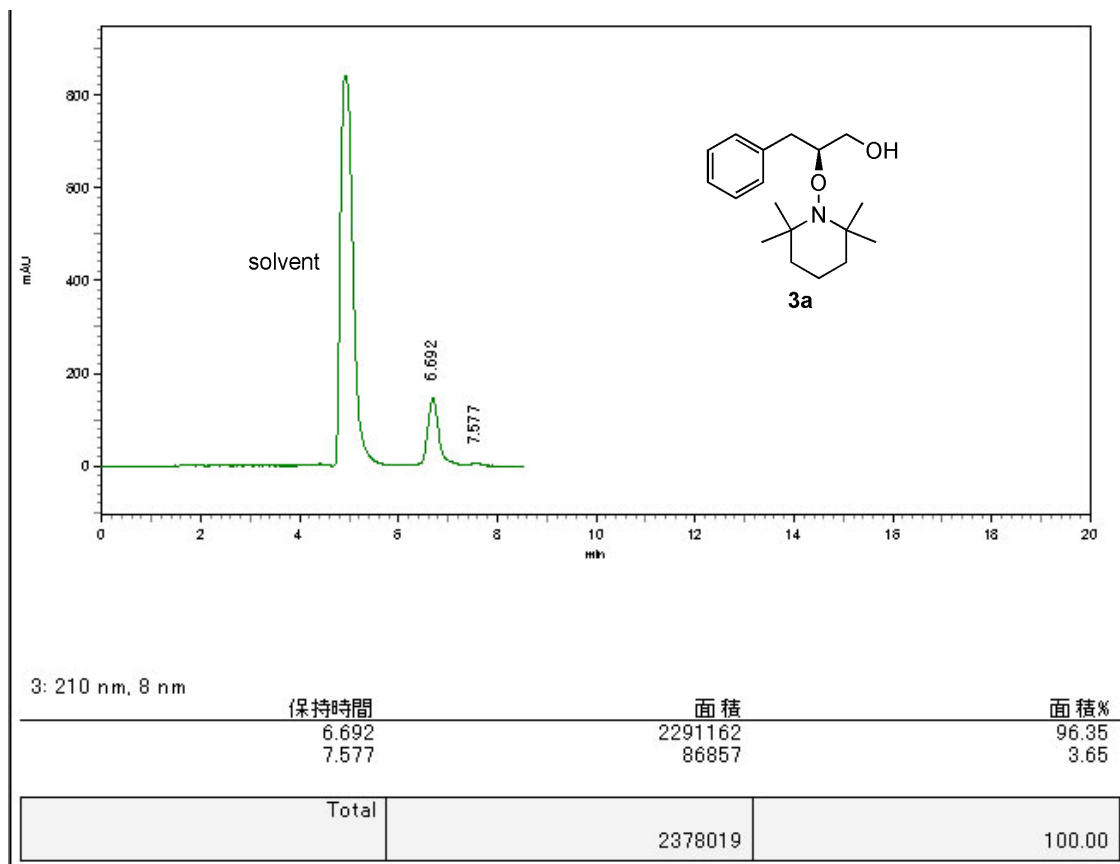

Chiralcel OD-H column, hexane/2-propanol = 98/2, 1.0 mL min<sup>-1</sup>

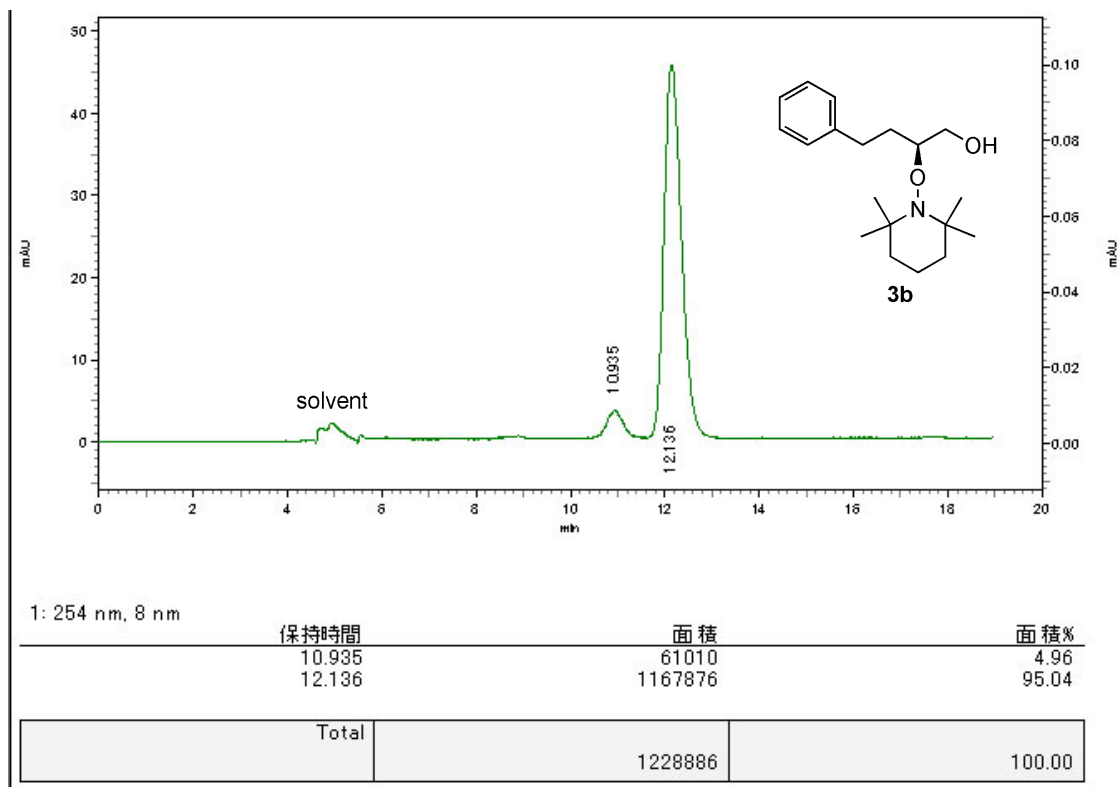

Chiralcel OD-H column, hexane/2-propanol = 90/10, 0.5 mL min<sup>-1</sup>

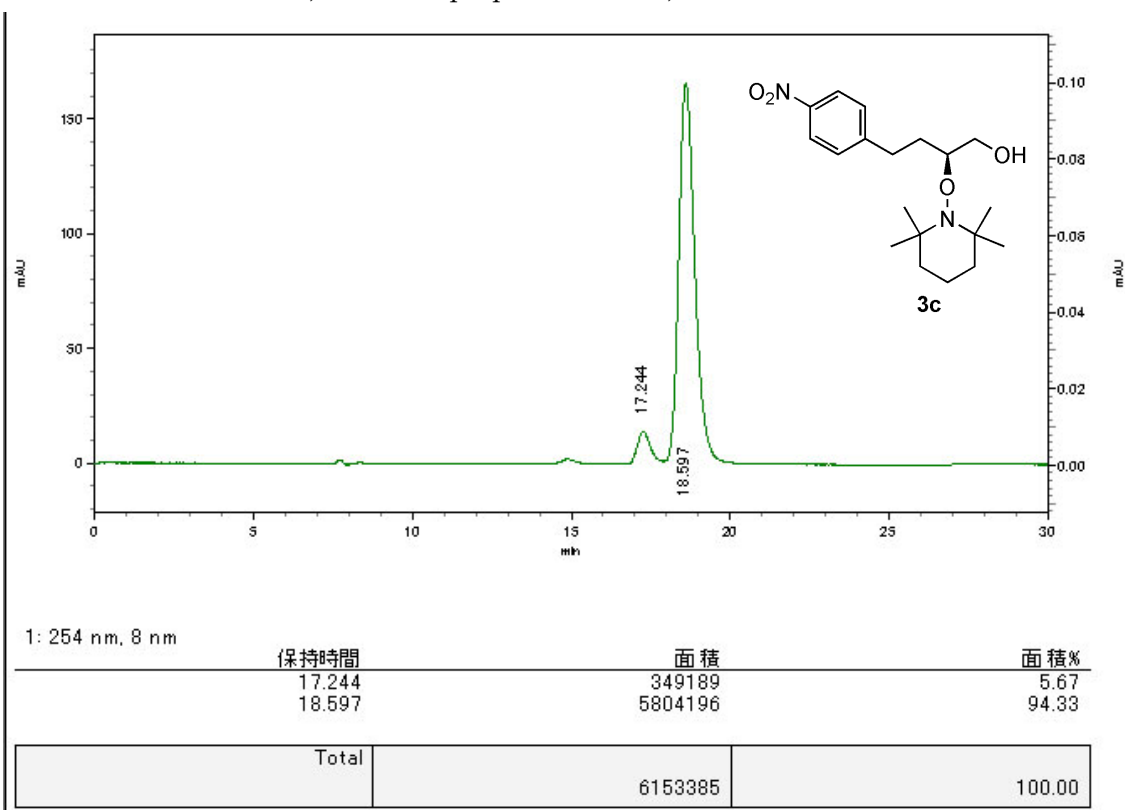

Chiralpak IA column, hexane/2-propanol = 98/2, 1.0 mL min<sup>-1</sup>

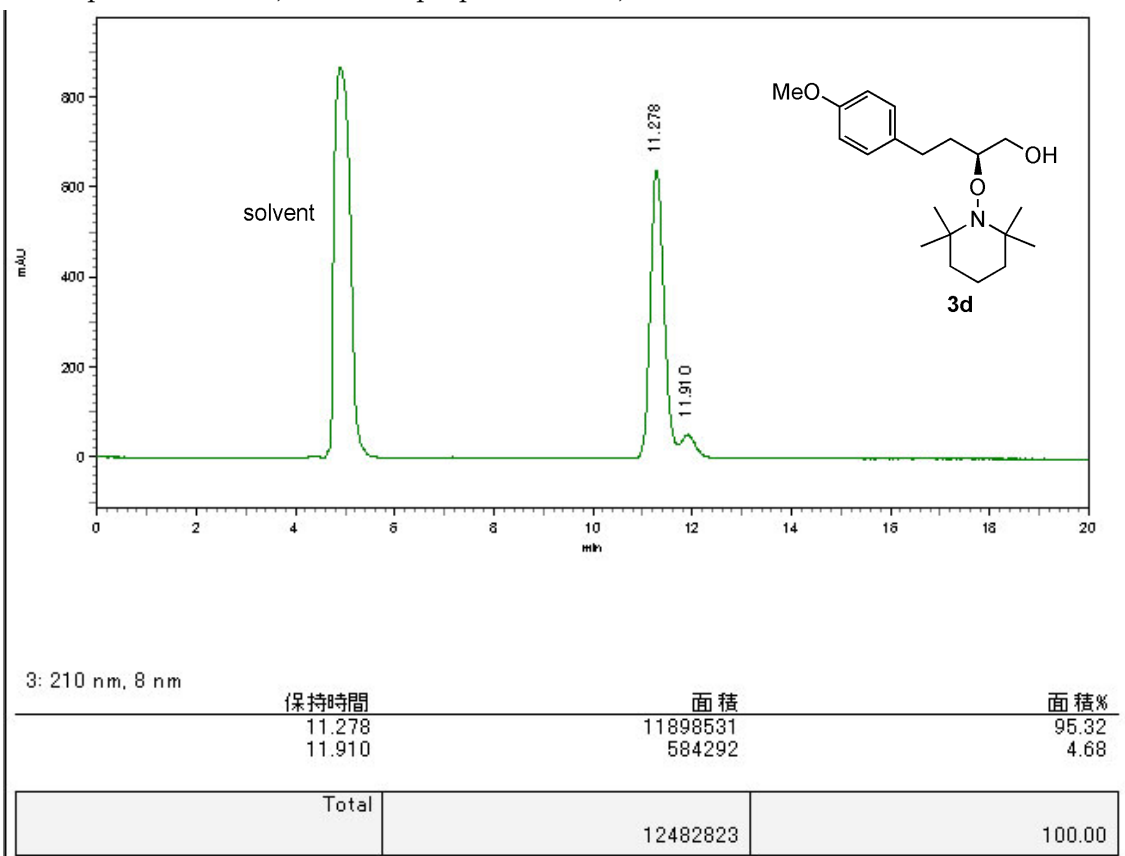

Chiralcel OD-H column, hexane/2-propanol = 98/2, 1.0 mL min<sup>-1</sup>

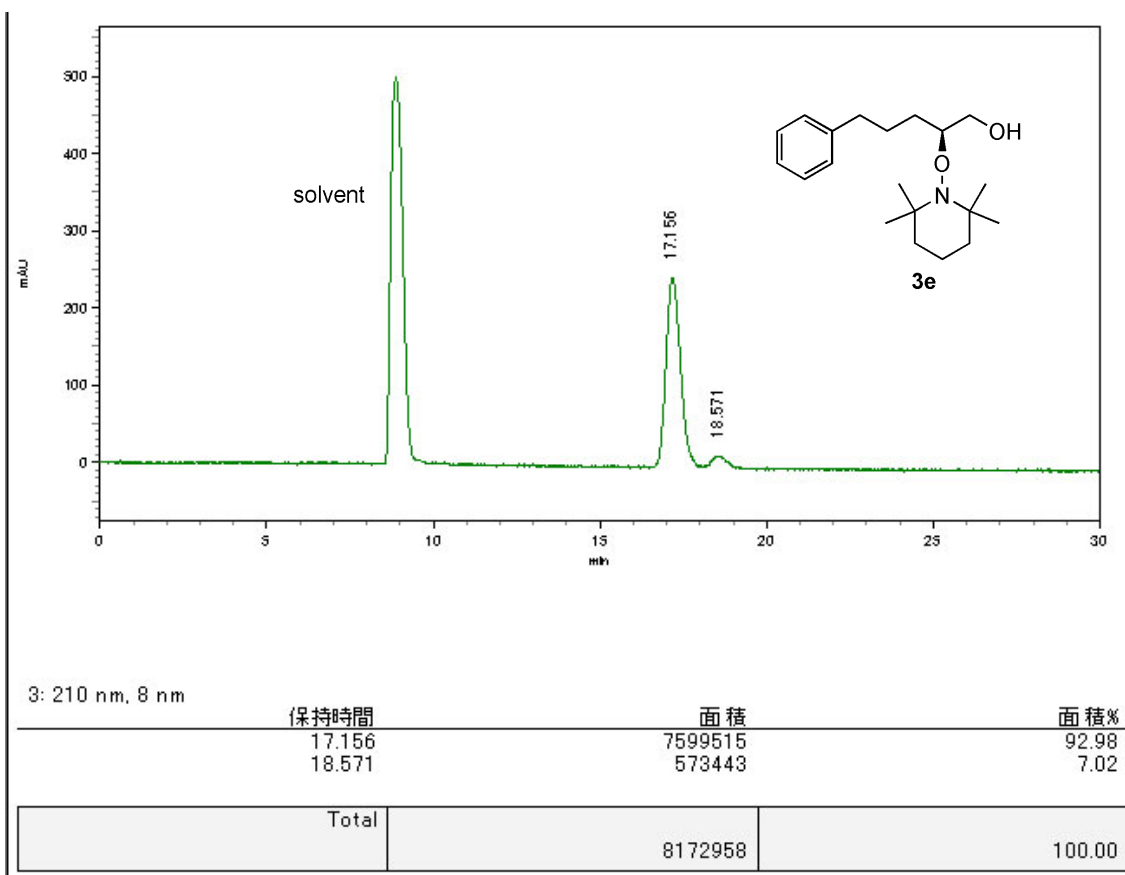

Chiralpak IA column, hexane/2-propanol = 99/1, 0.5 mL min<sup>-1</sup>

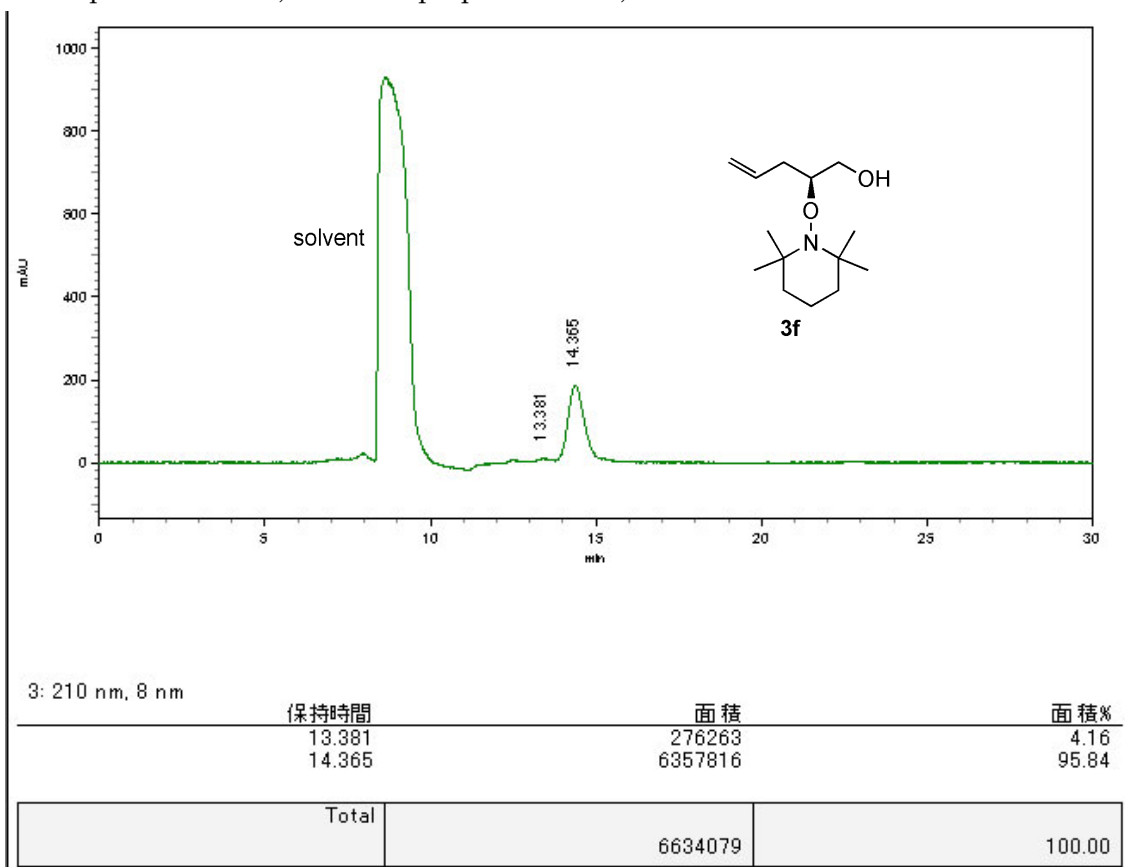

Chiralcel OJ column, hexane/2-propanol = 98/2, 1.0 mL min<sup>-1</sup>

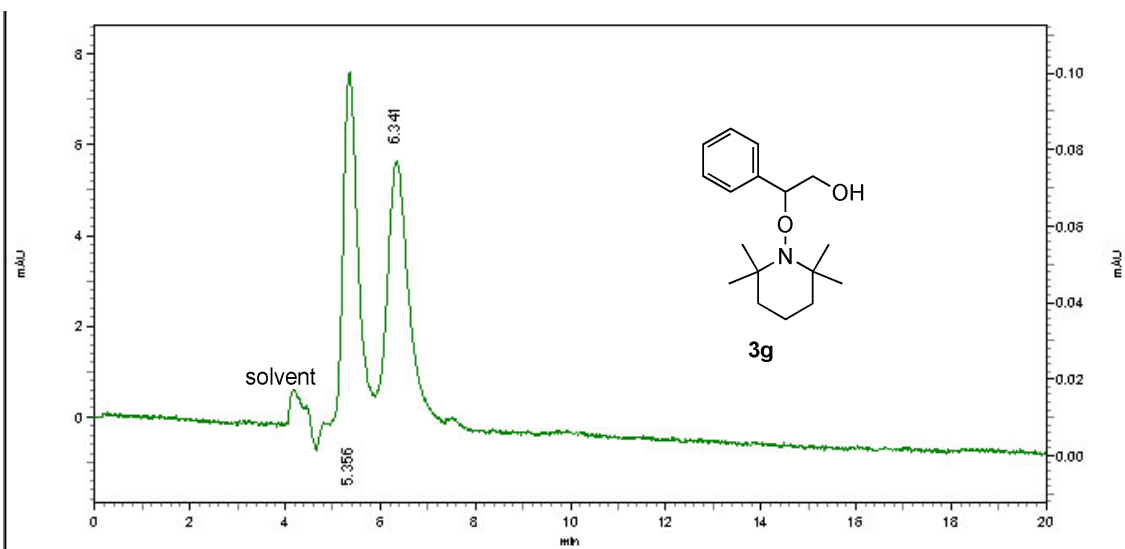

1: 260 nm, 8 nm

| 保持時間  | 面積     | 面積%    |
|-------|--------|--------|
| 5.356 | 166072 | 48.07  |
| 6.341 | 179425 | 51.93  |
| Total | 345497 | 100.00 |

# FAB Mass spectra

(matrix: 3-nitrobenzyl alcohol, positive ionization mode)

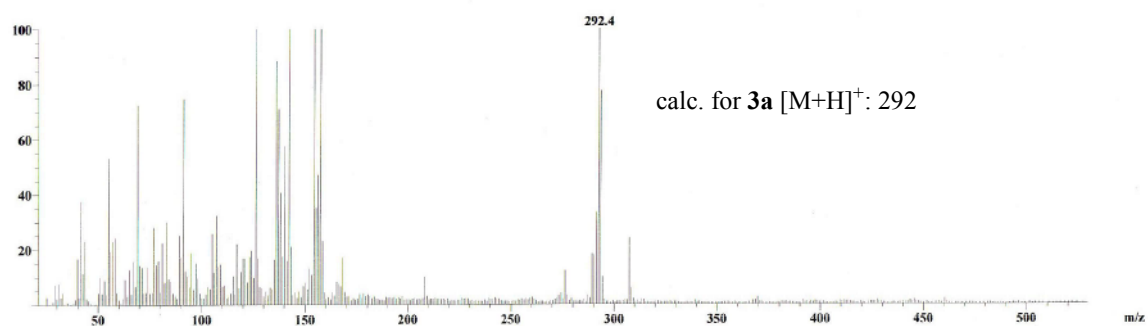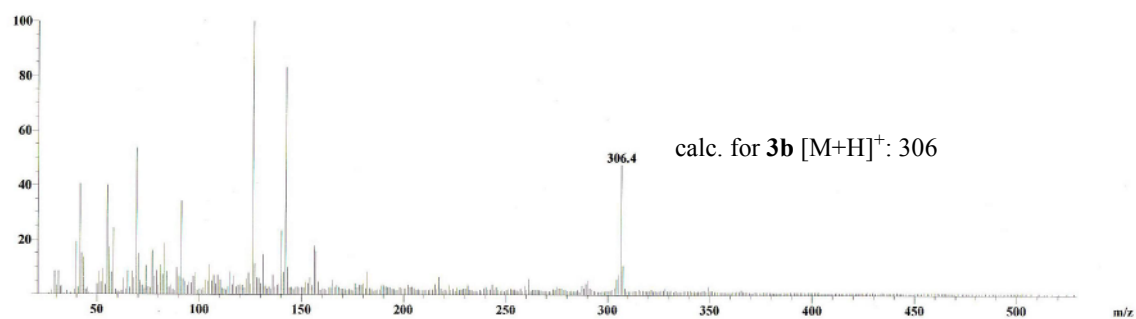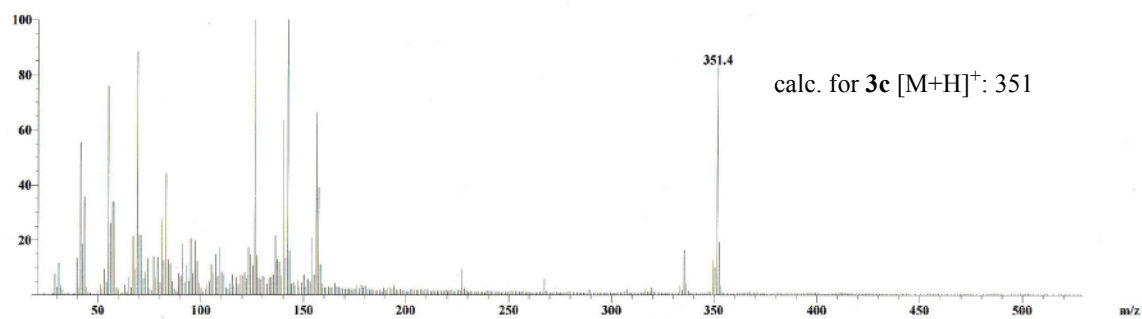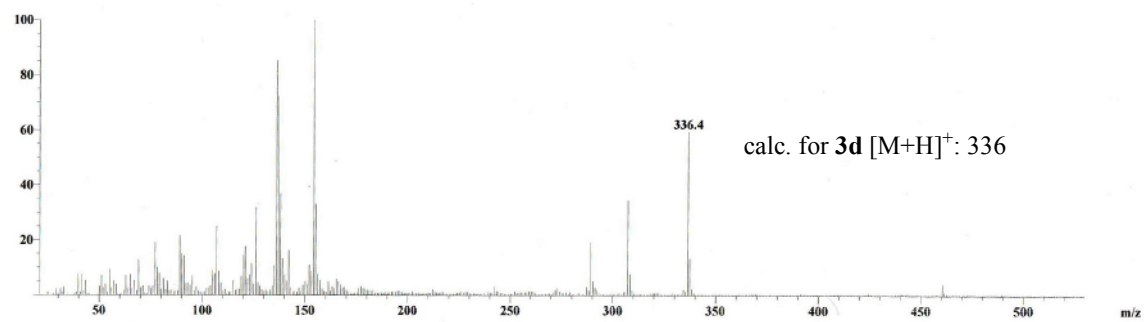

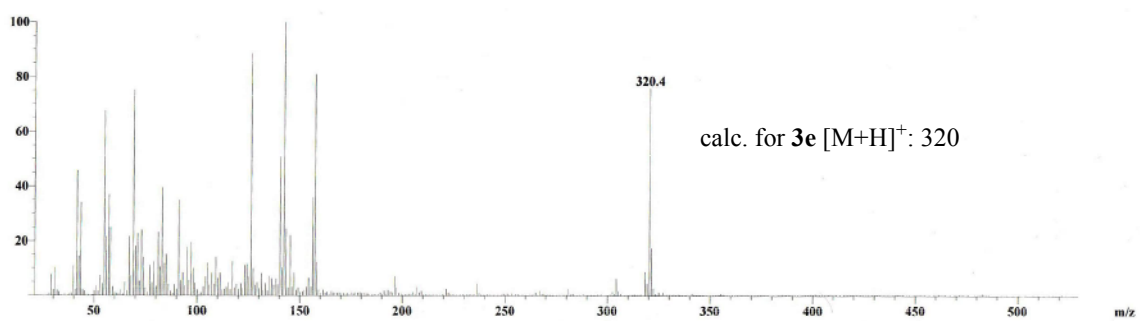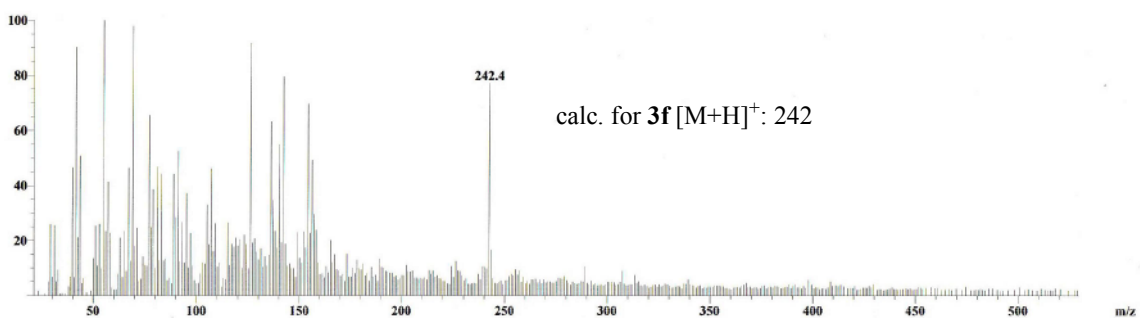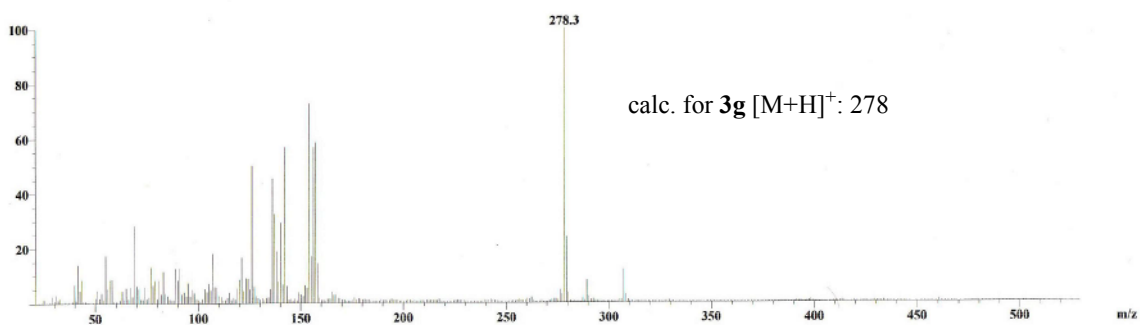

Supplement: c0cc02301a.pdf [file c0cc02301a.pdf]
